# Supplementary material for: Metal-free dehydrogenation of formic acid to H2 and CO2 using boron-based catalysts
Source: PubMed Central journal article supplement — Chem Sci. 2015 Mar 6;6(5):2938–42. doi: 10.1039/c5sc00394f (PMC5655896; doi:10.1039/c5sc00394f), 2015-03-06
Supplement: SC-006-C5SC00394F-s001.pdf [file SC-006-C5SC00394F-s001.pdf]

SUPPORTING INFORMATION FOR

Metal-Free Dehydrogenation of Formic Acid to H<sub>2</sub>  
and CO<sub>2</sub> Using Boron-Based Catalysts

Clément Chauvier, Anis Tlili, Christophe Das Neves Gomes, Pierre Thuéry  
and Thibault Cantat\*

*CNRS, UMR n° 3685 CEA – CNRS, F-91191 Gif-sur-Yvette France.*

*E-mail: [thibault.cantat@cea.fr](mailto:thibault.cantat@cea.fr)*

|                                                                          |    |
|--------------------------------------------------------------------------|----|
| 1. Experimental details .....                                            | 3  |
| 1.1. General considerations .....                                        | 3  |
| 1.2. Crystallography .....                                               | 3  |
| 2. Outcome of the catalytic experiments .....                            | 5  |
| 3. Procedures for the catalytic dehydrogenation of formic acid.....      | 8  |
| 4. Synthetic procedures. ....                                            | 12 |
| a) Synthesis of $[2^+, I^-]$ .....                                       | 12 |
| b) Synthesis of $[TBDH^+, 5^-]$ .....                                    | 13 |
| c) Synthesis of $[Et_3NH^+, 5^-]$ .....                                  | 14 |
| d) Synthesis of $[Et_3NH^+, 6^-]$ .....                                  | 16 |
| 5. Gases Analysis .....                                                  | 18 |
| 6. Computational details and structures.....                             | 19 |
| 6.1. Computed pathways for the dehydrogenation of formic acid .....      | 19 |
| 6.2. HCOOH, HCOO <sup>-</sup> , H <sub>2</sub> and CO <sub>2</sub> ..... | 21 |
| 6.3. 9-BBN derivatives .....                                             | 21 |
| 6.4. Cy <sub>2</sub> B derivatives.....                                  | 24 |
| 3.1. CatB derivatives .....                                              | 28 |
| 7. References .....                                                      | 31 |

## 1. Experimental details

### 1.1. General considerations

All reactions and manipulations were performed at 20 °C in a recirculating mBraun LabMaster DP inert atmosphere (Ar) drybox and vacuum Schlenk lines. Glassware was dried overnight at 120°C or flame-dried before use. <sup>1</sup>H, <sup>13</sup>C and <sup>11</sup>B NMR spectra were obtained using a Bruker DPX 200 MHz spectrometer. Chemical shifts for <sup>1</sup>H and <sup>13</sup>C{<sup>1</sup>H} NMR spectra were referenced to solvent impurities. <sup>11</sup>B NMR spectra were externally referenced using BF<sub>3</sub>•Et<sub>2</sub>O. Unless otherwise noted, reagents were purchased from commercial suppliers and dried over 4 Å molecular sieves prior to use. 4 Å molecular sieves (Aldrich) were dried under dynamic vacuum at 250 °C for 48 h prior to use. Tetrahydrofuran (THF), *d*<sub>8</sub>-tetrahydrofuran (*d*<sub>8</sub>-THF), toluene, pentane and *d*<sub>6</sub>-benzene were dried over a sodium(0)/benzophenone mixture and vacuum-distilled before use. CD<sub>3</sub>CN and CD<sub>2</sub>Cl<sub>2</sub> were dried over CaH<sub>2</sub> and vacuum-distilled before use. Boranes (*B*-I-9-BBN, *B*-Cl-9-BBN, *B*-OMe-9-BBN, *B*-OTf-9-BBN, 9-BBN dimer, BCy<sub>2</sub>I and BCy<sub>2</sub>Cl, PinBOMe, CatBCl, CatBBr, BCl<sub>3</sub>, BH<sub>3</sub>•SMe<sub>2</sub>, PhBCl<sub>2</sub>, BMes<sub>2</sub>F) and H<sup>13</sup>CO<sub>2</sub>H were obtained from Aldrich and used as received. HCO<sub>2</sub>H (99 %) was obtained from Acros and degassed prior to use. Triethylamine was purchased from Carlo Erba and degassed prior to use. Cyclohexene was purchased from Aldrich, passed through a column of alumina, dried over CaH<sub>2</sub> and vacuum-distilled before use.

### 1.2. Crystallography

The data were collected at 150(2) K on a Nonius Kappa-CCD area detector diffractometer<sup>[1]</sup> using graphite-monochromated Mo K $\alpha$  radiation ( $\lambda = 0.71073$  Å). The crystals were introduced into glass capillaries with a protective coating of Paratone-N oil (Hampton Research). The unit cell parameters were determined from ten frames, then refined on all data. The data (combinations of  $\varphi$ - and  $\omega$ -scans with a minimum redundancy of 4 for 90% of the reflections) were processed with HKL2000.<sup>[2]</sup> Absorption effects in [**2**<sup>+</sup>, I<sup>-</sup>] were corrected empirically with the program SCALEPACK.<sup>[2]</sup> The structures were solved by direct methods with SHELXS-97<sup>[3]</sup> or by intrinsic phasing with SHELXT,<sup>[4]</sup> expanded by subsequent difference Fourier synthesis and refined by full-matrix least-squares on  $F^2$  with SHELXL-97.<sup>[3]</sup> All non-hydrogen atoms were refined with anisotropic displacement parameters. One carbon atom of the TBDH<sup>+</sup> cation in [TBDH<sup>+</sup>, **5**<sup>-</sup>] is disordered over two positions which were refined with occupancies constrained to sum to unity. The hydrogen atoms bound to nitrogen atoms in [TBDH<sup>+</sup>, **5**<sup>-</sup>] were found on a difference Fourier map and the carbon-bound hydrogen atoms were introduced at calculated positions in both compounds; all were treated as riding atoms with an isotropic displacement parameter equal to 1.2 times that of the parent atom (1.5 for CH<sub>3</sub>, with optimized geometry).

Crystal data for [**2**<sup>+</sup>,  $\Gamma$ ]: C<sub>16</sub>H<sub>29</sub>BN<sub>3</sub>,  $M = 401.13$ , monoclinic, space group  $C2/c$ ,  $a = 17.3182(7)$ ,  $b = 19.7092(5)$ ,  $c = 12.0924(5)$  Å,  $\beta = 120.773(2)^\circ$ ,  $V = 3546.3(2)$  Å<sup>3</sup>,  $Z = 8$ . Refinement of 191 parameters on 5407 independent reflections out of 60769 measured reflections ( $R_{\text{int}} = 0.027$ ) led to  $R_1 = 0.024$ ,  $wR_2 = 0.060$ ,  $S = 1.049$ ,  $\Delta\rho_{\text{min}} = -0.61$ ,  $\Delta\rho_{\text{max}} = 0.60$  e Å<sup>-3</sup>.

Crystal data for [TBDH<sup>+</sup>, **5**<sup>-</sup>]: C<sub>17</sub>H<sub>30</sub>BN<sub>3</sub>O<sub>4</sub>,  $M = 351.25$ , orthorhombic, space group  $P2_12_12_1$ ,  $a = 7.1546(4)$ ,  $b = 12.8526(7)$ ,  $c = 20.4294(6)$  Å,  $V = 1878.59(16)$  Å<sup>3</sup>,  $Z = 4$ . Refinement of 237 parameters on 3552 independent reflections out of 42486 measured reflections ( $R_{\text{int}} = 0.021$ ) led to  $R_1 = 0.038$ ,  $wR_2 = 0.088$ ,  $S = 1.068$ ,  $\Delta\rho_{\text{min}} = -0.13$ ,  $\Delta\rho_{\text{max}} = 0.16$  e Å<sup>-3</sup>.

The molecular plots were drawn with ORTEP-3.<sup>[5]</sup> CCDC-1035083 and -1035084 contain the supplementary crystallographic data for compounds [**2**<sup>+</sup>,  $\Gamma$ ] and [TBDH<sup>+</sup>, **5**<sup>-</sup>], respectively. These data can be obtained free of charge from The Cambridge Crystallographic Data Centre via [www.ccdc.cam.ac.uk/data\\_request/cif](http://www.ccdc.cam.ac.uk/data_request/cif).

## 2. Outcome of the catalytic experiments

**Definitions:** In  $^1\text{H}$  NMR experiments, conversion of formic acid was determined by integration of the formic acid/formate proton ( $\underline{\text{H}}\text{-COOH}$ ) and the protons of the bis(formyloxy)borate species ( $\text{R}_2\text{B}(\text{OCHO})_2$ ) versus the internal standard ( $\text{C}_{Ar}\text{-}\underline{\text{H}}$ ,  $\delta = 6.79$  ppm in  $\text{CD}_3\text{CN}$ ). Qualitatively,  $\text{H}_2$  ( $\delta = 4.57$  ppm in  $\text{CD}_3\text{CN}$ ,  $\delta = 4.55$  ppm in  $d_8\text{-THF}$ ) and  $^{13}\text{CO}_2$  ( $\delta = 125.8$  ppm in  $\text{CD}_3\text{CN}$ ,  $\delta = 125.69$  ppm in  $d_8\text{-THF}$ ) are detected by  $^1\text{H}$  and  $^{13}\text{C}$  NMR spectroscopy.

In all experiments, the chemical shift of the formate proton slightly depends on the pH of the solution *i.e.* on the amount of free base and actual formate concentration. On the contrary the bis(formyloxy)borate protons do not exhibit pH-dependency ( $\Delta\delta < 0.1$  ppm).

Turnover number at time  $t$  (TON) is: 
$$\text{TON} = \frac{n_{\text{HCOOH}}^i - n_{\text{HCOOH}}^t}{n_{\text{cat.}}} = \frac{\rho}{x}$$

- $n_{\text{HCOOH}}^i$  is the initial number of moles of formic acid
- $n_{\text{HCOOH}}^t$  is the number of moles of formate (including bis(formyloxy)borate) at time  $t$
- $n_{\text{cat.}}$  is the initial number of moles of catalyst at time  $t$
- $\rho$  is the actual measured conversion (%)
- $x$  is the molar percentage (mol%) of catalyst introduced for the reaction.

Turnover frequency number (TOF) after  $t$  hours is: 
$$\text{TOF} (\text{h}^{-1}) = \frac{\text{TON}}{t}$$

**Observation:** For the reactions with  $\text{R}_2\text{B-X}$  ( $\text{R}_2\text{B} = \text{Cy}_2\text{B}$  or  $\text{BBN}$ ,  $\text{X} = \text{I}, \text{Cl}, \text{OTf}, \text{OMe}$ ) in  $\text{CD}_3\text{CN}$ , FA and the base must be either pre-mixed or added sequentially prior to the borane to ensure that the catalysis takes place. Indeed, when the borane and the base are added prior to formic acid, temporary deactivation of the catalyst was observed that resulted in a lengthy activation period of the catalytic system.

### Control experiments.

- a) The heating of the 5 HCOOH / 2  $\text{NEt}_3$  mixture in either  $\text{CD}_3\text{CN}$  or THF showed no detectable conversion after 48h at  $130^\circ\text{C}$  (Entries 1 and 2, Table S1).
- b) The heating of pure HCOOH with  $\text{BBN-I}$  (5 mol%), but without external base ( $\text{NEt}_3$  or  $\text{MTBD}$ ) led to no reaction after 30 h at  $130^\circ\text{C}$  in acetonitrile (Entry 11, Table S1).

**Table S1.** Organocatalytic dehydrogenation of formic acid with triethylamine

| Entry | Catalyst<br>[mol%]                                         | Temp<br>[°C] | Solvent                       | Cat. (x mol%)<br>+ 2/5 NEt <sub>3</sub> |                                  |
|-------|------------------------------------------------------------|--------------|-------------------------------|-----------------------------------------|----------------------------------|
|       |                                                            |              |                               | HCO <sub>2</sub> H                      | CO <sub>2</sub> + H <sub>2</sub> |
|       |                                                            |              | Solvent, T, 19 h              |                                         |                                  |
| Entry | Catalyst<br>[mol%]                                         | Temp<br>[°C] | Solvent                       | Conversion [%]                          | TON (time, h)                    |
| 1     | –                                                          | 130          | CD <sub>3</sub> CN            | < 5                                     | –                                |
| 2     | –                                                          | 130          | TDF                           | < 5                                     | –                                |
| 3     | <b>BBN-I</b> (5.0)                                         | 130          | TDF                           | 48                                      | 9.6 (19)                         |
| 4     | <b>BBN-I</b> (5.0)                                         | 130          | C <sub>6</sub> D <sub>6</sub> | < 5                                     | –                                |
| 5     | <b>BBN-I</b> (5.0)                                         | 130          | Tol-d <sub>8</sub>            | < 5                                     | –                                |
| 6     | <b>BBN-I</b> (5.0)                                         | 130          | CD <sub>3</sub> OD            | < 5                                     | –                                |
| 7     | <b>BBN-I</b> (5.0)                                         | 130          | CD <sub>3</sub> CN            | 84                                      | 16.8 (19)                        |
| 8     | <b>BBN-I</b> (5.0)                                         | 100          | CD <sub>3</sub> CN            | < 5                                     | –                                |
| 9     | <b>BBN-I</b> (5.0)                                         | 110          | CD <sub>3</sub> CN            | < 5                                     | –                                |
| 10    | <b>BBN-I</b> (5.0)                                         | 120          | CD <sub>3</sub> CN            | 18                                      | 3.6 (19)                         |
| 11    | <b>BBN-I</b> (5.0)                                         | 130          | CD <sub>3</sub> CN            | < 5 <sup>[a]</sup>                      | –                                |
| 12    | <b>BBN-OTf</b> (5.0)                                       | 130          | CD <sub>3</sub> CN            | 59                                      | 11.8 (19)                        |
| 13    | <b>BBN-OMe</b> (5.0)                                       | 130          | CD <sub>3</sub> CN            | 88                                      | 17.5 (19)                        |
| 14    | <b>[TBDH<sup>+</sup>, 5<sup>-</sup>]</b> (5.0)             | 130          | CD <sub>3</sub> CN            | 67                                      | 13.4 (19)                        |
| 15    | <b>[TBDH<sup>+</sup>, 5<sup>-</sup>]</b> (2.0)             | 130          | CD <sub>3</sub> CN            | 59                                      | 23.6 (19)                        |
| 16    | <b>BBN-H</b> (5.0)                                         | 130          | CD <sub>3</sub> CN            | 52                                      | 10.4 (19)                        |
| 17    | <b>Cy<sub>2</sub>B-I</b> (10.0)                            | 130          | CD <sub>3</sub> CN            | > 99                                    | 10 (4.5)                         |
| 18    | <b>Cy<sub>2</sub>B-I</b> (5.0)                             | 130          | CD <sub>3</sub> CN            | > 99                                    | 20 (19)                          |
| 19    | <b>Cy<sub>2</sub>B-I</b> (1.0)                             | 130          | CD <sub>3</sub> CN            | 79                                      | 79 (19), 100 (40)                |
| 20    | <b>Cy<sub>2</sub>B-Cl</b> (5.0)                            | 130          | CD <sub>3</sub> CN            | > 99                                    | 20 (19)                          |
| 21    | <b>Cy<sub>2</sub>B-OTf</b> (5.0)                           | 130          | CD <sub>3</sub> CN            | > 99                                    | 20 (19)                          |
| 22    | <b>[Et<sub>3</sub>NH<sup>+</sup>, 6<sup>-</sup>]</b> (5.0) | 130          | CD <sub>3</sub> CN            | > 99                                    | 20 (8)                           |
| 23    | <b>[Et<sub>3</sub>NH<sup>+</sup>, 6<sup>-</sup>]</b> (2.5) | 130          | CD <sub>3</sub> CN            | > 99                                    | 20 (9)                           |
| 24    | <b>[Et<sub>3</sub>NH<sup>+</sup>, 6<sup>-</sup>]</b> (1.0) | 130          | CD <sub>3</sub> CN            | 78                                      | 78 (19), 100 (26)                |
| 25    | <b>catB-Cl</b> (5.0)                                       | 130          | CD <sub>3</sub> CN            | < 5                                     | –                                |
| 26    | <b>catB-Br</b> (5.0)                                       | 130          | CD <sub>3</sub> CN            | < 5                                     | –                                |
| 27    | <b>pinB-OMe</b> (5.0)                                      | 130          | CD <sub>3</sub> CN            | < 5                                     | –                                |
| 28    | <b>B(C<sub>6</sub>F<sub>5</sub>)<sub>3</sub></b> (5.0)     | 130          | CD <sub>3</sub> CN            | < 5                                     | –                                |
| 29    | <b>PhBCl<sub>2</sub></b> (5.0)                             | 130          | CD <sub>3</sub> CN            | < 5                                     | –                                |
| 30    | <b>Mes<sub>2</sub>B-F</b> (5.0)                            | 130          | CD <sub>3</sub> CN            | < 5                                     | –                                |
| 31    | <b>BCl<sub>3</sub></b> (5.0)                               | 130          | CD <sub>3</sub> CN            | 44                                      | 8.8 (19)                         |

[a] No base added.

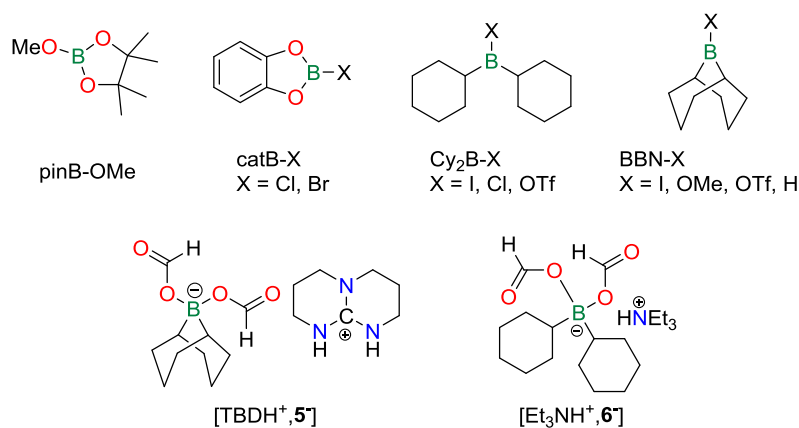

**Table S2.** Influence of the initial pH (*i.e.* the amount of base added) on the reaction conversion.

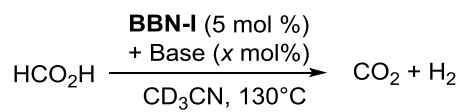

| Entry | Base [mol%]             | Conversion [%] (16h) | Conversion [%] (19h) |
|-------|-------------------------|----------------------|----------------------|
| 1     | 0 (NEt <sub>3</sub> )   | < 5                  | < 5                  |
| 2     | 0 (MTBD)                | < 5                  | < 5                  |
| 3     | 5 (MTBD)                | < 5                  | < 5                  |
| 4     | 10 (MTBD)               | –                    | 49                   |
| 2     | 10 (NEt <sub>3</sub> )  | < 5                  | < 5                  |
| 3     | 30 (NEt <sub>3</sub> )  | 52                   | 86                   |
| 4     | 40 (NEt <sub>3</sub> )  | 57                   | 85                   |
| 5     | 50 (NEt <sub>3</sub> )  | 62                   | 86                   |
| 6     | 80 (NEt <sub>3</sub> )  | 70                   | 86                   |
| 7     | 100 (NEt <sub>3</sub> ) | 68                   | 81                   |

### 3. Procedures for the catalytic dehydrogenation of formic acid.

**Caution:** Full decomposition of formic acid generates high pressure in a sealed tube!

#### Reaction in Wilmad medium-wall NMR tubes:

*General procedure for the catalytic dehydrogenation of formic acid / triethylamine azeotropic mixture (molar ratio 5:2) with borane catalysts.*

In a glovebox, an oven-dried Wilmad NMR tube was charged with preformed and degassed  $\text{HCO}_2\text{H} / \text{Et}_3\text{N}$  (5:2, molar ratio) (18.0  $\mu\text{L}$ , 0.2 mmol FA), mesitylene as an internal standard and solvent (0.20 mL). To this homogeneous solution was added the borane ( $x$  mol%) via syringe and the tube was capped and shaken vigorously to ensure complete dissolution of the borane catalyst. When solid catalysts were used (e.g.  $[\text{TBDH}^+, \mathbf{5}^-]$  or  $[\text{Et}_3\text{NH}^+, \mathbf{6}^-]$ ), the addition order was reversed.

A first  $^1\text{H}$  NMR spectrum was then acquired to set the initial formic acid (formate) / mesitylene ratio (the singlet 6.79 ppm in  $\text{CD}_3\text{CN}$  was used) and the tube was immersed in a pre-heated silicon-oil bath at the indicated temperature (oil-bath temperature). The reactions were periodically cooled down to room temperature and monitored by NMR spectroscopy.

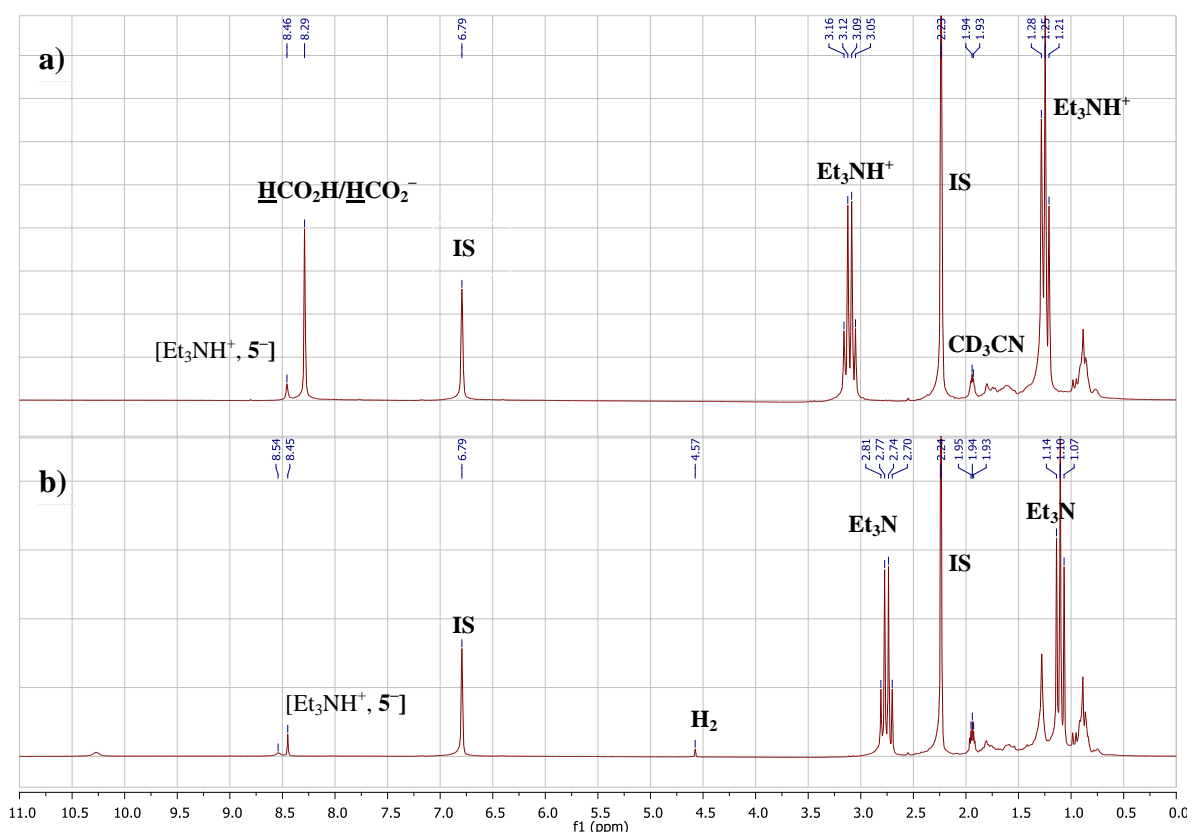

**Figure S1.** Typical  $^1\text{H}$  NMR spectra obtained in  $\text{CD}_3\text{CN}$  for the catalytic dehydrogenation of 5 FA/2 TEA with 5 mol% BBN-I. a) crude reaction mixture before heating;  $t = 0$ . b) crude reaction mixture after 19 h at  $130^\circ\text{C}$ , 87 % conversion,  $\text{H}_2$  gas visible at  $\delta = 4.57$  ppm.



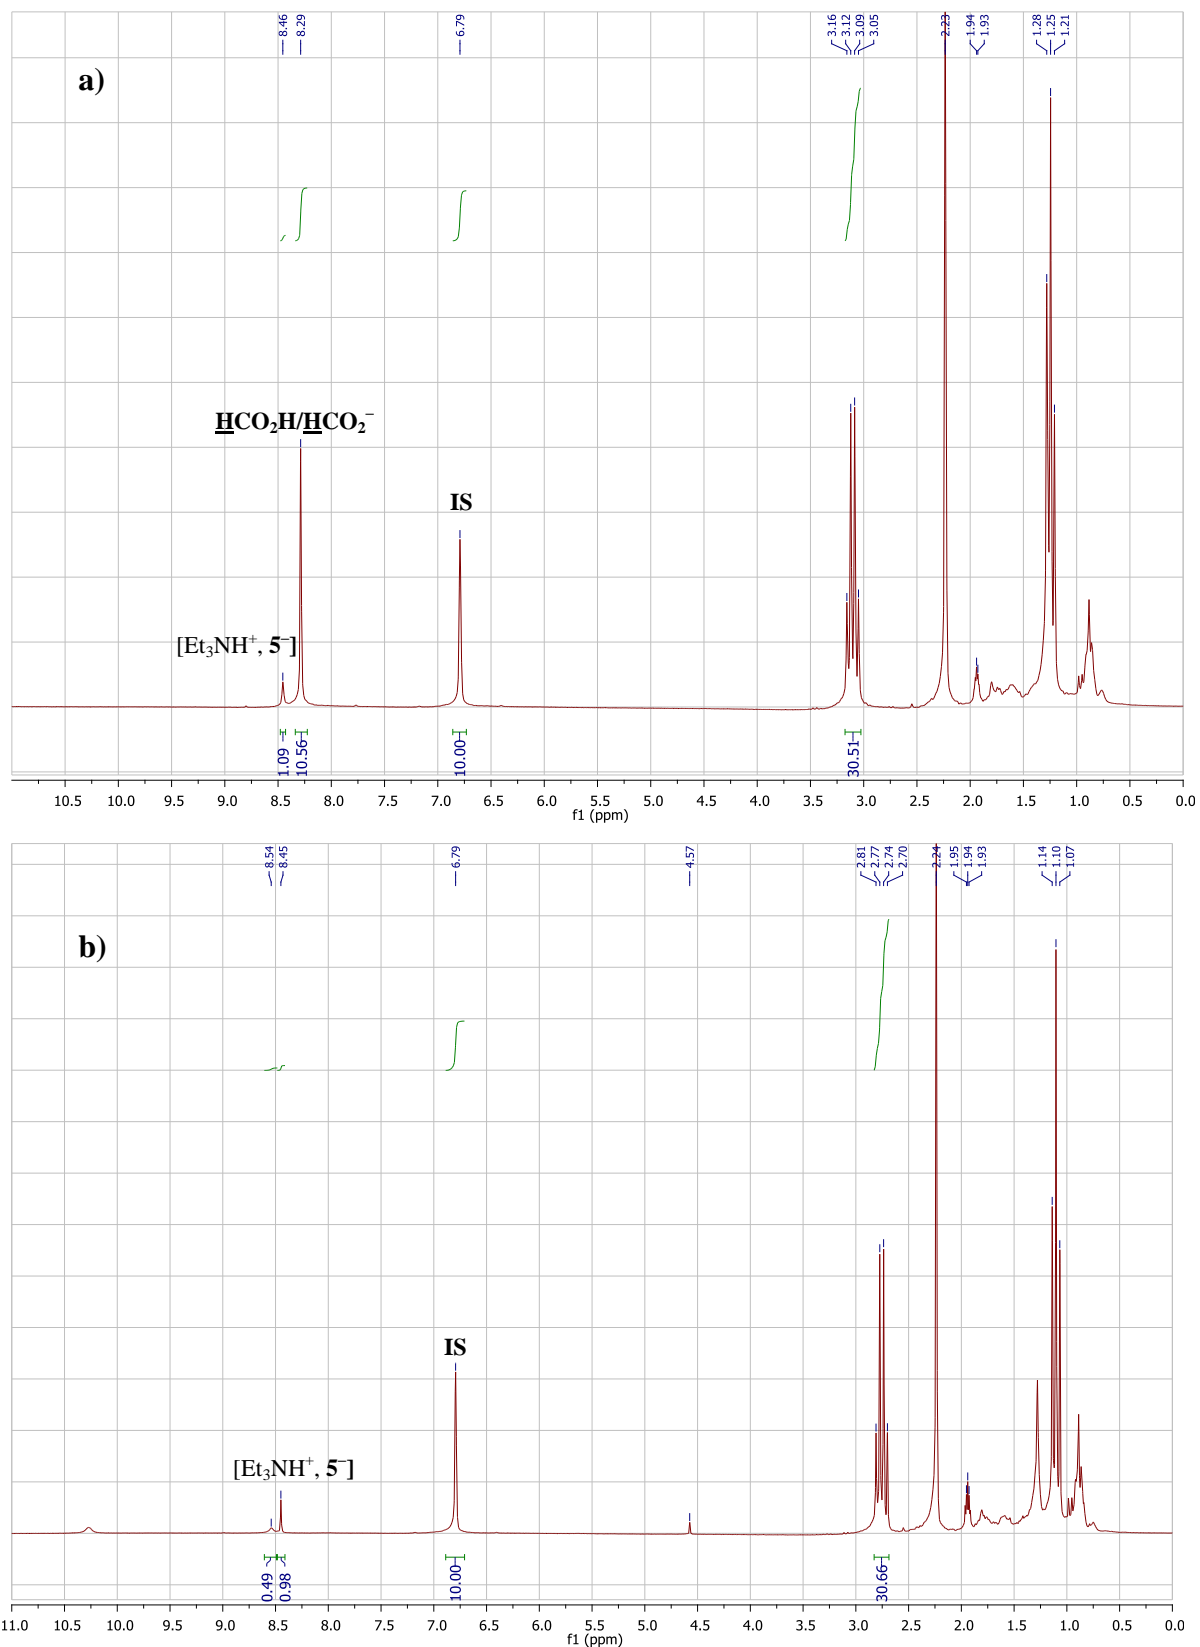

**Figure S2.** Typical  $^1\text{H}$  NMR spectra obtained in  $\text{CD}_3\text{CN}$  for the catalytic dehydrogenation of 5 FA/2 TEA with 5 mol% BBN-I; a) before heating. b) after 19 h at 130°C. Integrations show that the amount of  $[\mathbf{5}^-, \text{Et}_3\text{NH}^+]$  is constant and that the conversion reaches 87 % after 19h.

**Reaction with  $\text{H}^{13}\text{CO}_2\text{H}$ :** The same procedure given page S9 was used and  $\text{H}^{12}\text{CO}_2\text{H}$  was replaced with  $\text{H}^{13}\text{CO}_2\text{H}$ .  $^{13}\text{CO}_2$  was the sole  $^{13}\text{C}$  enriched product detected along with formates ions and trace of carbonate. Typical spectra are given in Figure S6.

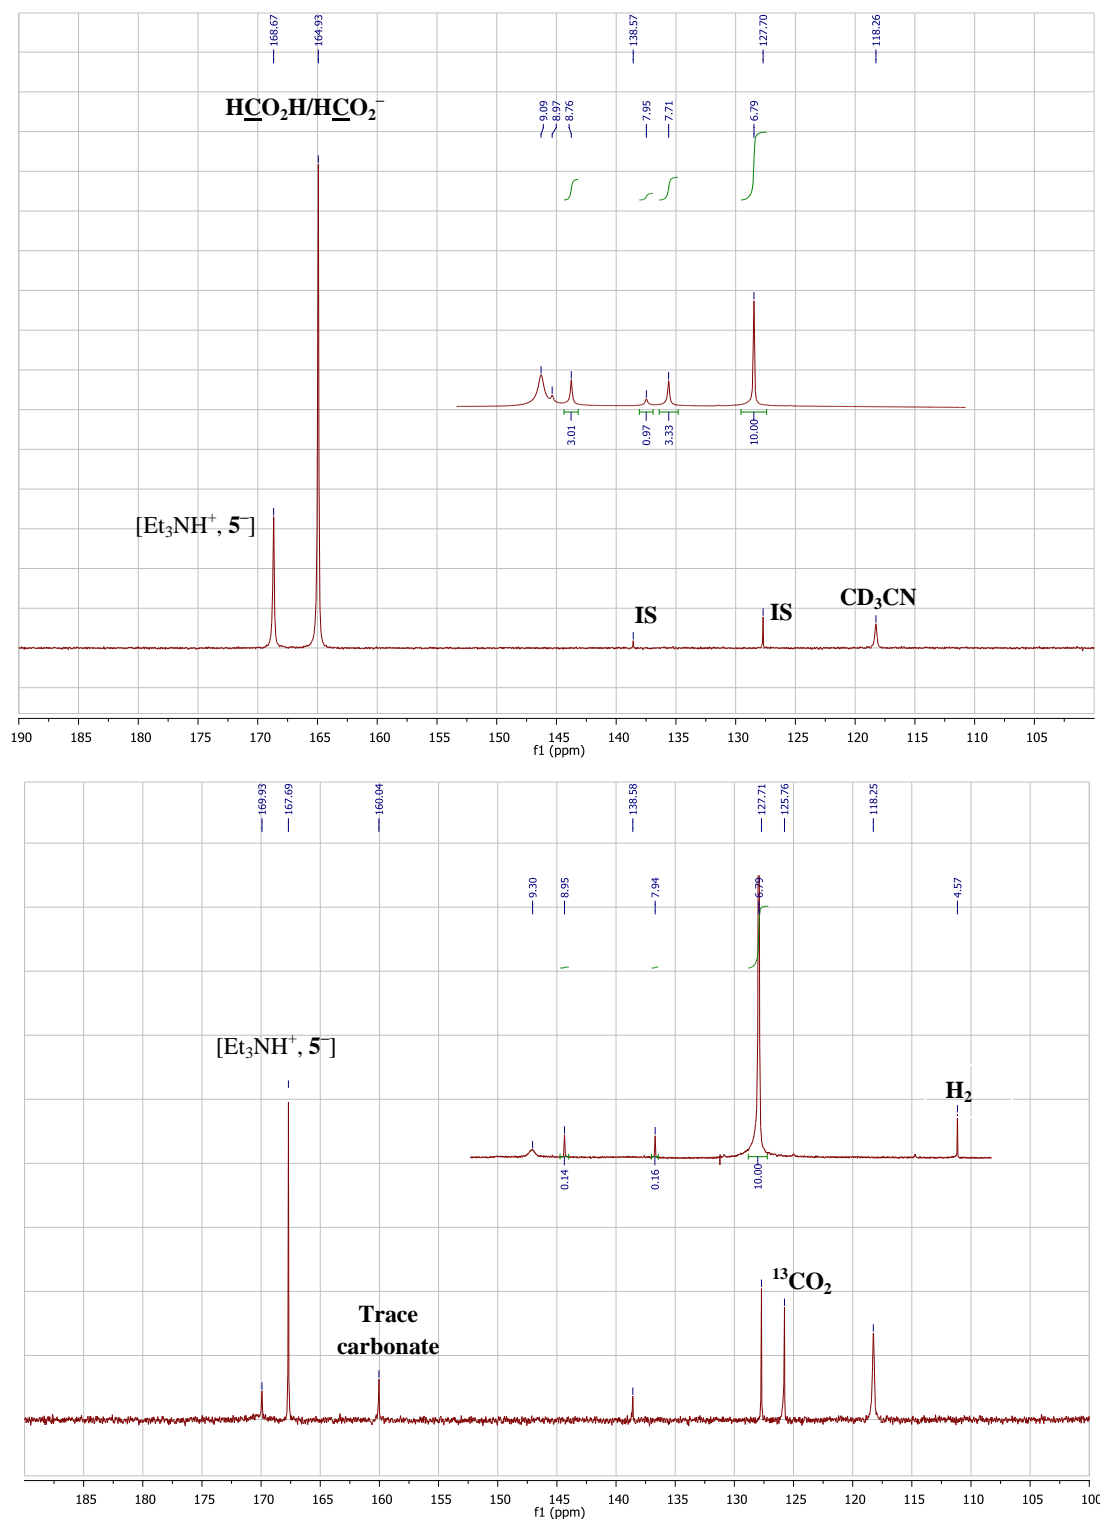

**Figure S3.**  $^{13}\text{C}$  NMR spectra obtained in  $\text{CD}_3\text{CN}$  for the catalytic dehydrogenation of 5 FA/2 TEA with 10 mol% BBN-I; a) before heating. b) after 19 h at  $130^\circ\text{C}$ .

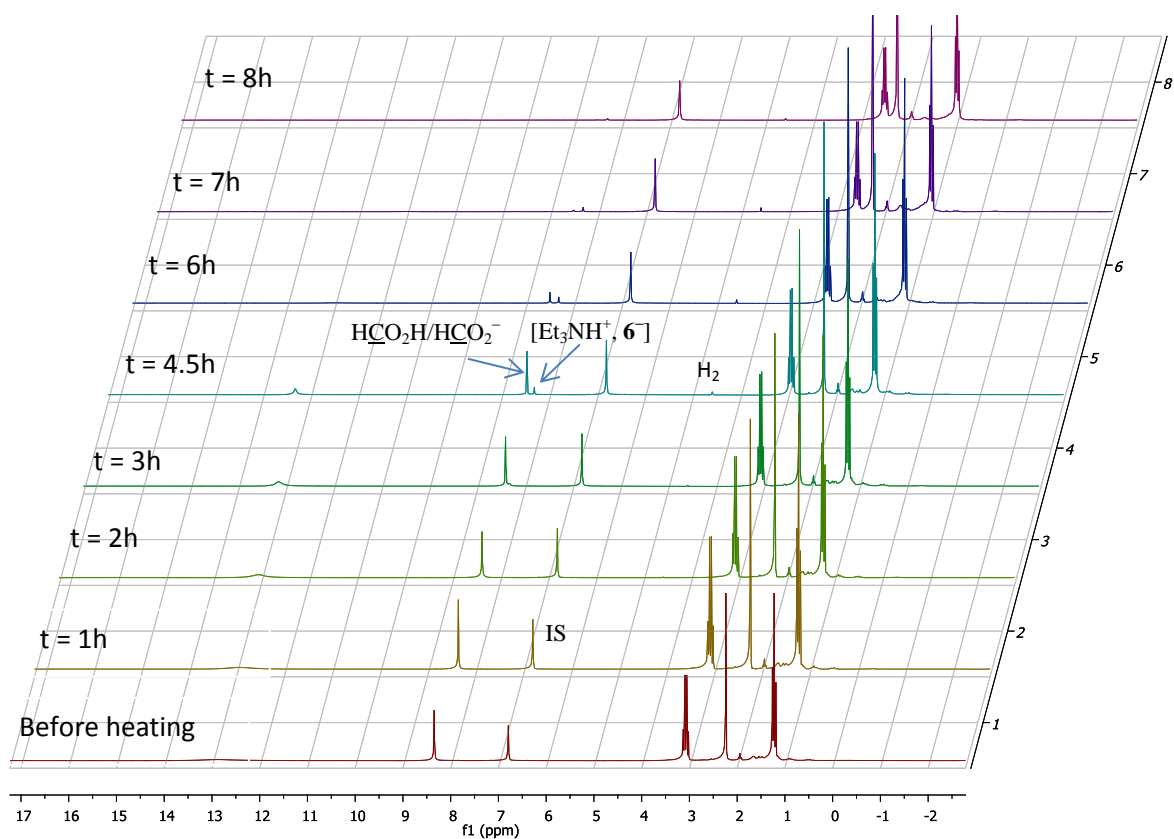

**Figure S4.**  $^1\text{H}$  NMR spectra obtained in  $\text{CD}_3\text{CN}$  for the catalytic dehydrogenation of 5 FA/2 TEA with 5 mol%  $[\text{Et}_3\text{NH}^+, \mathbf{6}^-]$  over 8 hours. There is overlap between signals of  $\mathbf{6}^-$  and  $\text{HCO}_2^-$  until 4.5h (65 % conversion).

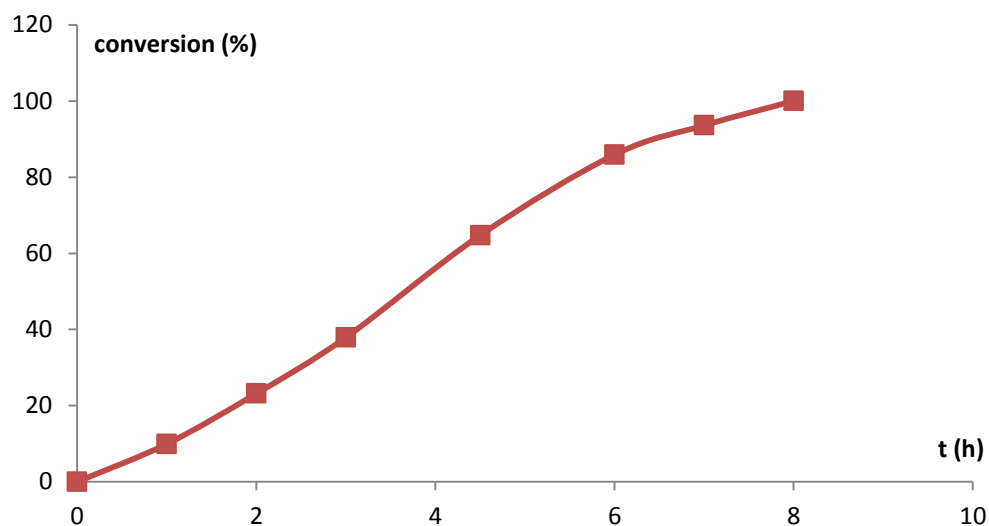

**Figure S5.** Plot of FA conversion versus time using 5 mol%  $[\text{Et}_3\text{NH}^+, \mathbf{6}^-]$  in  $\text{CD}_3\text{CN}$ .

## 4. Synthetic procedures.

### a) Synthesis of $[2^+, \Gamma^-]$ .

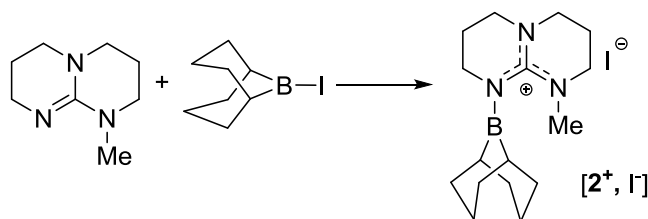

A 25-mL, flame dried round-bottomed flask equipped with a stirring bar and a J-Young valve was charged with MTBD (53.1 mg, 0.347 mmol, 1 equiv) and 3.5 mL of THF. A solution of BBN-I (1 M in hexane, 350  $\mu$ L, 0.350 mmol, 1.01 equiv.) was then added dropwise at RT over 5 min affording a white solid instantaneously. The resulting suspension was stirred for 2 hours at RT in the glovebox. The white precipitate was then filtered, washed with diethyl ether (3 x 5 mL) and dried under high-vacuum to afford 112 mg of  $[2^+, \Gamma^-]$  (0.28 mmol, 81 %). Crystals suitable for X-Ray diffraction were obtained from the slow cooling of a saturated THF solution of  $[2^+, \Gamma^-]$ .

$^1\text{H NMR}$  (200 MHz,  $\text{CD}_2\text{Cl}_2$ ):  $\delta$  4.13 (m, 1H), 3.95 (m, 1H), 3.75 (m, 2H), 3.48 (m, 4H), 3.10 (s, 3H), 2.49-1.18 (m, 18H) ppm.

$^{13}\text{C NMR}$  (50 MHz,  $\text{CD}_2\text{Cl}_2$ ):  $\delta$  158.7, 48.7, 48.4, 43.4, 41.2, 36.1, 35.5, 31.5, 30.9, 25.9, 24.9, 20.9, 20.4 ppm.

$^{11}\text{B NMR}$  (64 MHz,  $\text{CD}_2\text{Cl}_2$ ):  $\delta$  57.2 ppm.

**Elemental Analysis:** calcd for  $\text{C}_{16}\text{H}_{29}\text{BIN}_3$  (M 401,14  $\text{g}\cdot\text{mol}^{-1}$ ): C : 47.91, H : 7.29, N : 10.48. Found : C : 48.26, H 6.96; N 11.63.

**Figure S6.** ORTEP view of compound  $2^+$  in  $[2^+, \Gamma^-]$ . Displacement ellipsoids are drawn at the 50% probability level and hydrogen atoms are omitted.

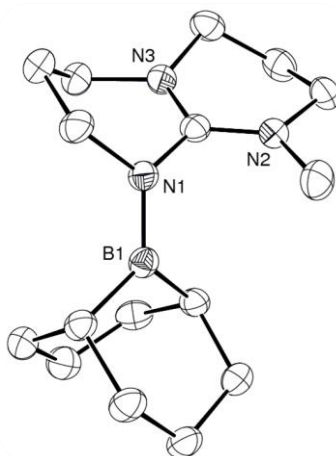

**b) Synthesis of [TBDH<sup>+</sup>, 5<sup>-</sup>].**

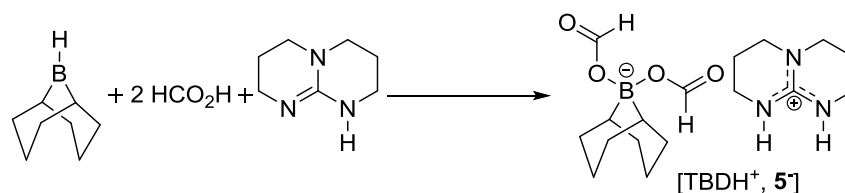

A 25-mL, flame dried round-bottomed flask equipped with a stirring bar and a J-Young valve was charged with 9-BBN dimer (342 mg, 1.4 mmol, 0.5 equiv.) and 5 mL of toluene. The resulting suspension was stirred vigorously at RT to ensure complete dissolution of the hydroborane reagent. The flask was then sequentially charged with formic acid (258 mg, 211  $\mu$ L, 5.6 mmol, 2 equiv), added *via* syringe, and TBD (390 mg, 2.8 mmol, 1 equiv), poured in one portion. While H<sub>2</sub> release is quite slow when only formic acid is added, the addition of the base considerably increases the rate of H<sub>2</sub> evolution. The reaction mixture was stirred at RT for 2 h to ensure full conversion of the starting borane (until evolution of H<sub>2</sub> ends). Pentane (*c.a.* 5 mL) was added then added to the reaction mixture and the resulting white solid was isolated by filtration and washed with pentane (*c.a.* 3 x 2 mL). [TBDH<sup>+</sup>, 5<sup>-</sup>] was obtained in almost quantitative yield (930 mg, 2.6 mmol, 93 %), after removal of the volatiles under reduced pressure. Crystals suitable for X-Ray diffraction analysis were obtained from the slow cooling of a saturated toluene solution of [TBDH<sup>+</sup>, 5<sup>-</sup>]. [TBDH<sup>+</sup>, 5<sup>-</sup>] was purified by recrystallization from warm toluene.

**<sup>1</sup>H NMR (200 MHz, CD<sub>3</sub>CN)**  $\delta$  8.40 (s, 2H), 6.94 (bs, 2H), 3.23 (dd,  $J$  = 11.3, 5.3 Hz, 8H), 2.06 – 1.21 (m, 16H), 0.72 (bs, 2H).

**<sup>13</sup>C NMR (50 MHz, CD<sub>3</sub>CN)**  $\delta$  167.23, 152.07, 47.43, 38.74, 32.07, 25.62, 21.16.

**<sup>11</sup>B NMR (64 MHz, CD<sub>3</sub>CN)**  $\delta$  8.87.

**Elemental Analysis :** calcd (%) for C<sub>17</sub>H<sub>30</sub>BN<sub>3</sub>O<sub>4</sub> (351.25 g.mol<sup>-1</sup>): C 58.13, H 8.61, N 11.96; found: C 58.12, H 8.58 N 12.16.

**Figure S7.** ORTEP view of compound [TBDH<sup>+</sup>, 5<sup>-</sup>]. Displacement ellipsoids are drawn at the 50% probability level and carbon-bound hydrogen atoms are omitted. Only one position of the disordered atom is represented.

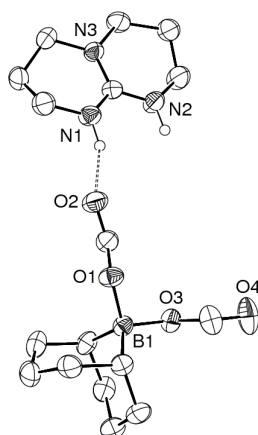

**Figure S8.** View of the hydrogen bonded one-dimensional polymer in compound  $[\text{TBDH}^+, \mathbf{5}^-]$ . Displacement ellipsoids are drawn at the 30% probability level. Carbon-bound hydrogen atoms are omitted and hydrogen bonds are shown as dashed lines.

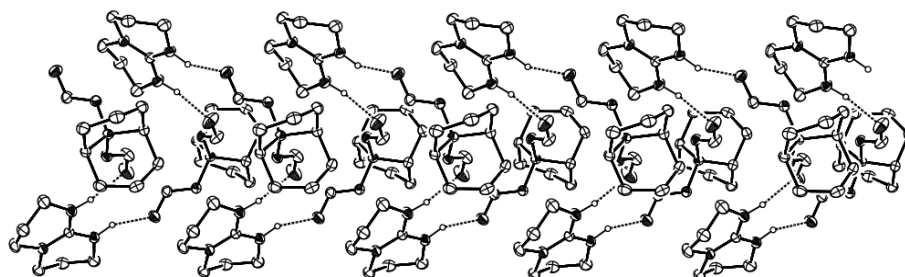

**c) Synthesis of  $[\text{Et}_3\text{NH}^+, \mathbf{5}^-]$ .**

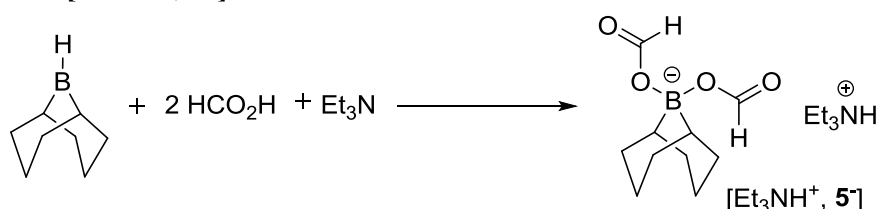

The procedure detailed for the synthesis of  $[\text{TBDH}^+, \mathbf{5}^-]$  was employed for the synthesis of  $[\text{Et}_3\text{NH}^+, \mathbf{5}^-]$ , by replacing TBD with  $\text{NEt}_3$ . A colorless oil was obtained, which gradually crystallized at  $-35^\circ\text{C}$  in the glovebox freezer. The resulting waxy white solid was washed with pentane (3 x 2 mL) and dried under high vacuum to give  $[\text{Et}_3\text{NH}^+, \mathbf{5}^-]$  in quantitative yield. Attempts to crystallize  $[\text{Et}_3\text{NH}^+, \mathbf{5}^-]$  in several solvents ( $\text{Et}_2\text{O}$ , THF, toluene, benzene, MeCN and pentane) failed due to the formation of an oil, whose solubility increases with solvent polarity.  $[\text{Et}_3\text{NH}^+, \mathbf{5}^-]$  may be best described as ionic liquid.

$^1\text{H}$  NMR (200 MHz,  $\text{CD}_3\text{CN}$ )  $\delta$  8.60 (bs, 1H), 8.44 (s, 2H), 3.14 (q,  $J = 7.3$  Hz, 6H), 1.88 – 1.36 (m, 12H), 1.24 (t,  $J = 7.3$  Hz, 9H), 0.75 (bs, 2H) ppm.

$^{13}\text{C}$  NMR (50 MHz,  $\text{CD}_3\text{CN}$ )  $\delta$  167.84, 47.46, 32.09, 25.58, 9.04 ppm.

$^{11}\text{B}$  NMR (64 MHz,  $\text{CD}_3\text{CN}$ )  $\delta$  8.98 ppm.

**Elemental Analysis:** calcd (%) for  $\text{C}_{16}\text{H}_{32}\text{BNO}_4$  ( $313.25 \text{ g}\cdot\text{mol}^{-1}$ ): C 61.35, H 10.30, N 4.47; found: C 58.29, H 10.13, N 4.28.

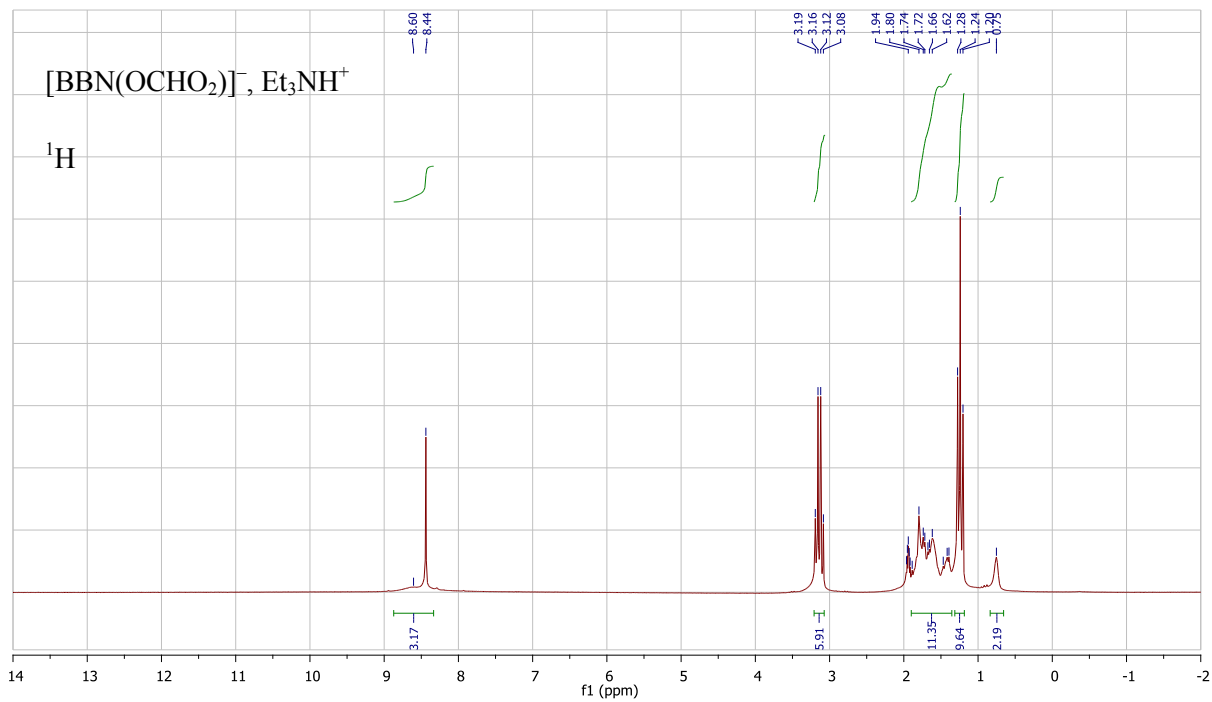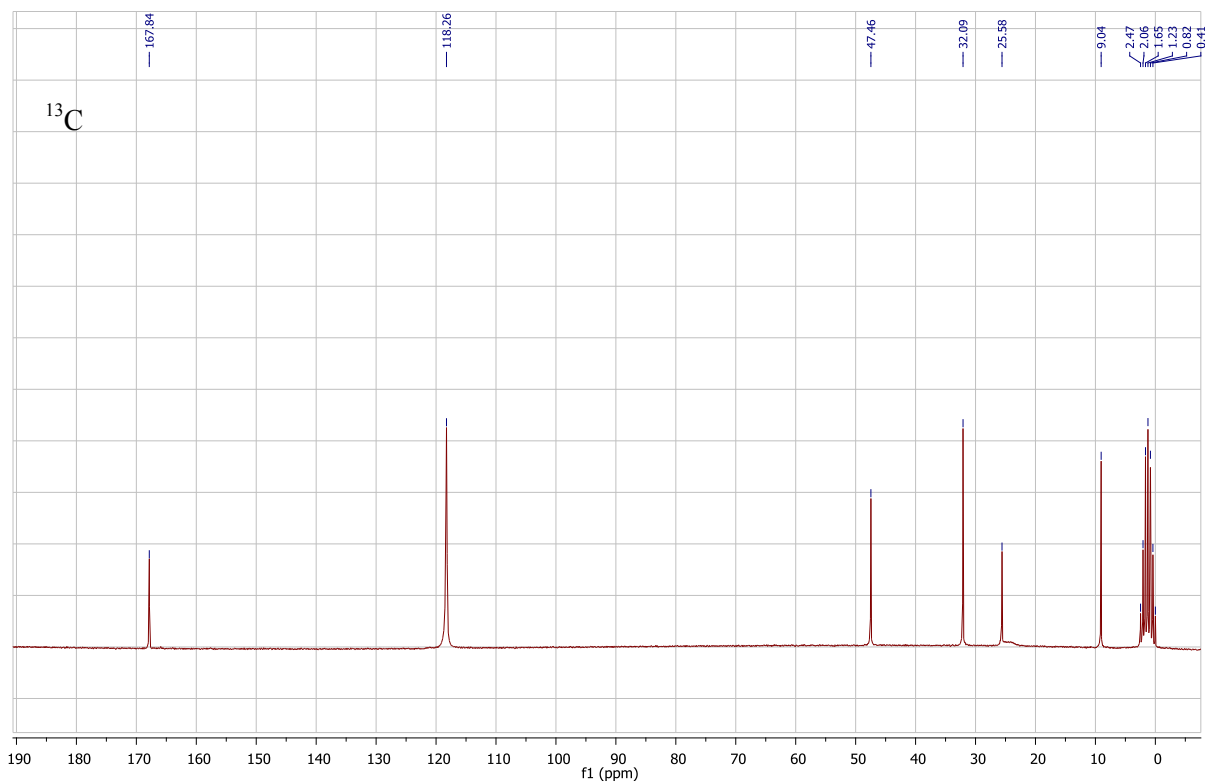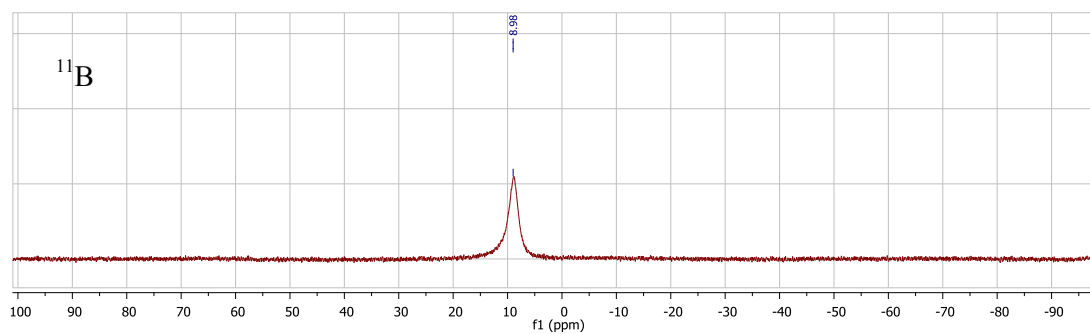

d) Synthesis of  $[\text{Et}_3\text{NH}^+, \mathbf{6}^-]$ .

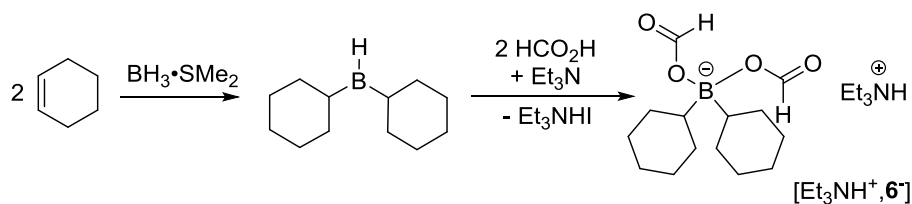

Following a reported procedure<sup>[6]</sup>, a 50 mL, flame-dried, round-bottomed flask equipped with a stirring bar and a J-Young valve was charged with cyclohexene (1.1 mL, 11.2 mmol) and dry diethyl ether (5 mL). In a glovebox, the resulting mixture was cooled down in the freezer at  $-35^\circ\text{C}$  and borane-dimethyl sulfide complex (2.8 mL, 5.6 mmol, 2M in toluene) was added dropwise over 5 min. The reaction flask was then quickly removed from the glovebox and immersed in an ice-bath and the resulting reaction mixture was stirred for 3h at  $0^\circ\text{C}$ . The white solid formed was allowed to settle without stirring and the supernatant was removed carefully by syringe. The remaining solid was then dried under high-vacuum to give dicyclohexylborane (918 mg, 92 %) as a free-flowing powder that was used without further purification.

The procedure detailed for the synthesis of  $[\text{TBDH}^+, \mathbf{5}^-]$  was employed for the synthesis of  $[\text{Et}_3\text{NH}^+, \mathbf{6}^-]$ , by replacing TBD with  $\text{NEt}_3$  and 9-BBN dimer by  $\text{C}_2\text{BH}$ . A colorless oil was obtained, which crystallized by addition of cold pentane to afford a waxy white solid, that was washed with pentane (3 x 2 mL) and dried under high-vacuum to give  $[\text{Et}_3\text{NH}^+, \mathbf{6}^-]$  (901 mg, 90 %).

**$^1\text{H}$  NMR (200 MHz,  $\text{CD}_3\text{CN}$ )**  $\delta$  8.77 (s, 1H,  $\text{NH}$ ), 8.29 (s, 2H,  $\text{HC(O)O}$ ), 3.13 (t,  $J = 7.2$  Hz, 6H), 1.65 (d,  $J = 4.3$  Hz, 4H), 1.50 (d,  $J = 12.8$  Hz, 4H), 1.24 (t,  $J = 7.3$  Hz, 9H), 1.12 (d,  $J = 7.6$  Hz, 4H), 1.01 – 0.73 (m, 4H), 0.48 (tt,  $J = 12.0$  Hz, 2H,  $\text{CH-B}$ ) ppm.

**$^{13}\text{C}$  NMR (50 MHz,  $\text{CD}_3\text{CN}$ )**  $\delta$  166.43, 47.39, 29.38, 28.50, 9.06. ppm.

**$^{11}\text{B}$  NMR (64 MHz,  $\text{CD}_3\text{CN}$ )**  $\delta$  11.17 ppm.

**Elemental Analysis:** calcd (%) for  $\text{C}_{20}\text{H}_{40}\text{BNO}_4$  ( $369.30 \text{ g}\cdot\text{mol}^{-1}$ ): C 65.04, H 10.92, N 3.79; found: C 63.05, H 11.03, N 3.41.



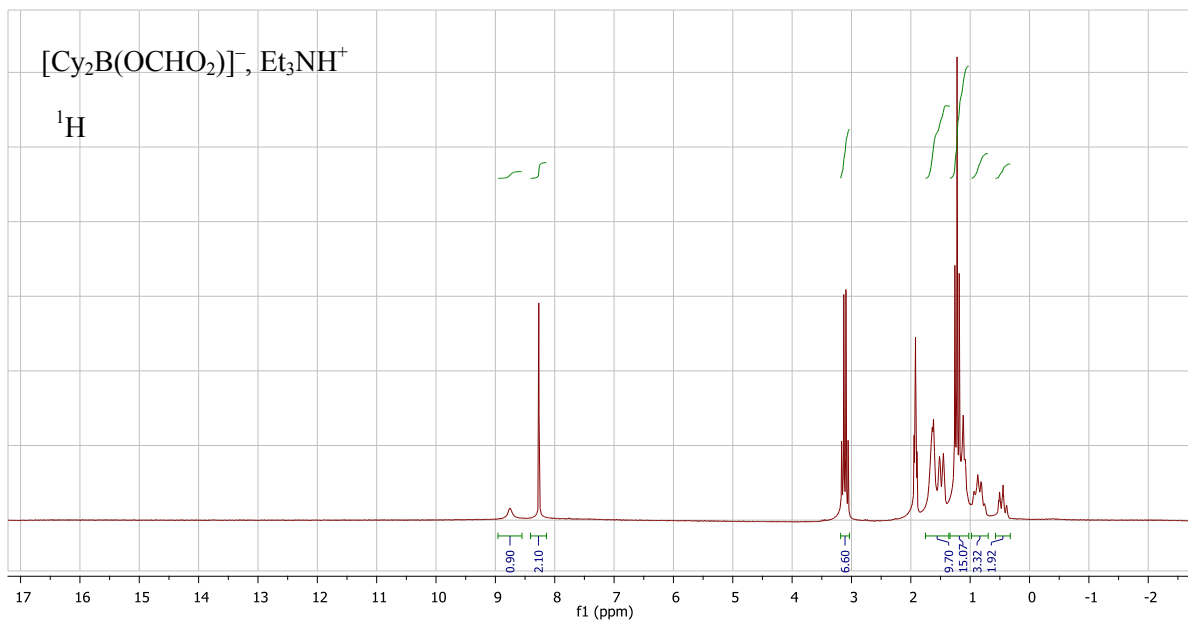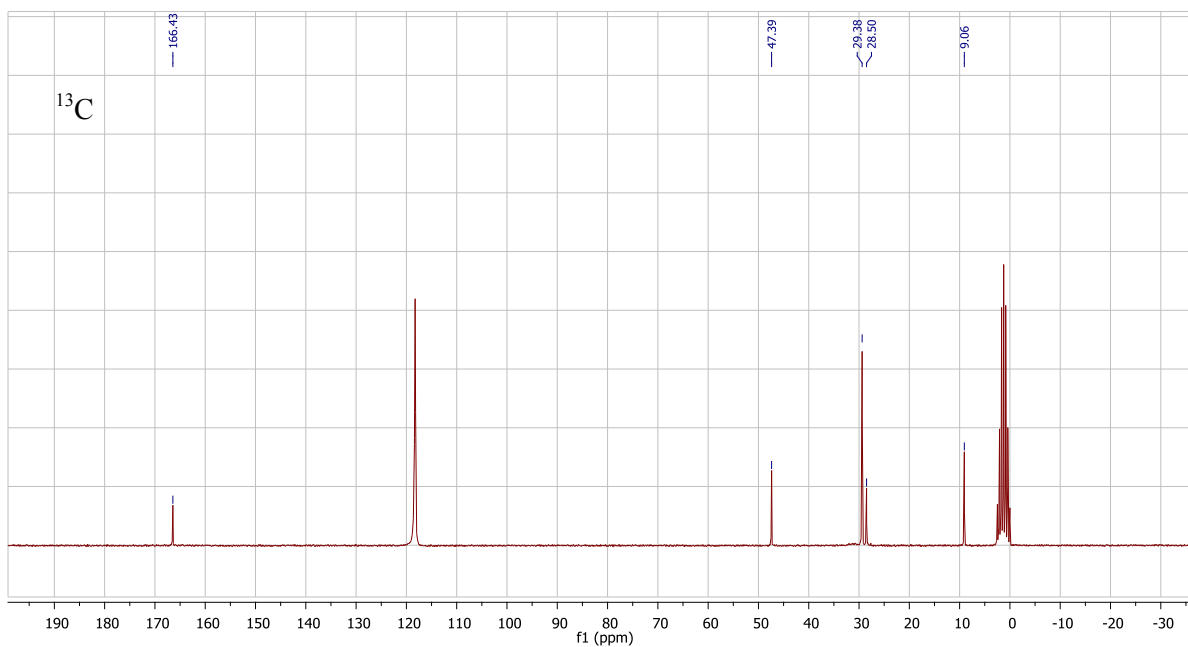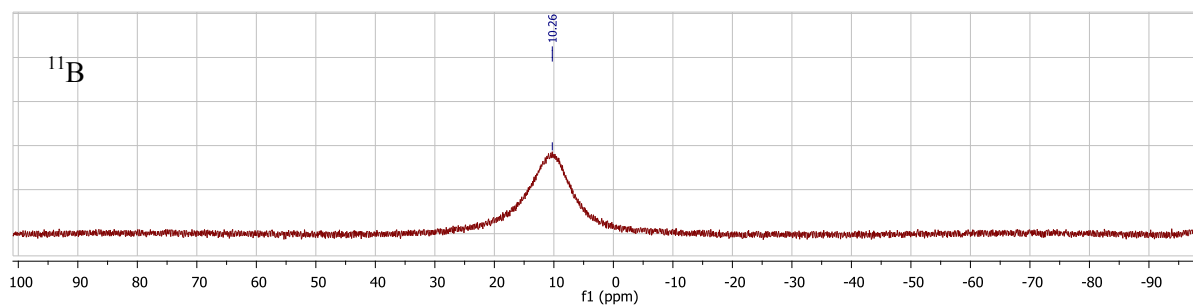

## 5. Gases Analysis

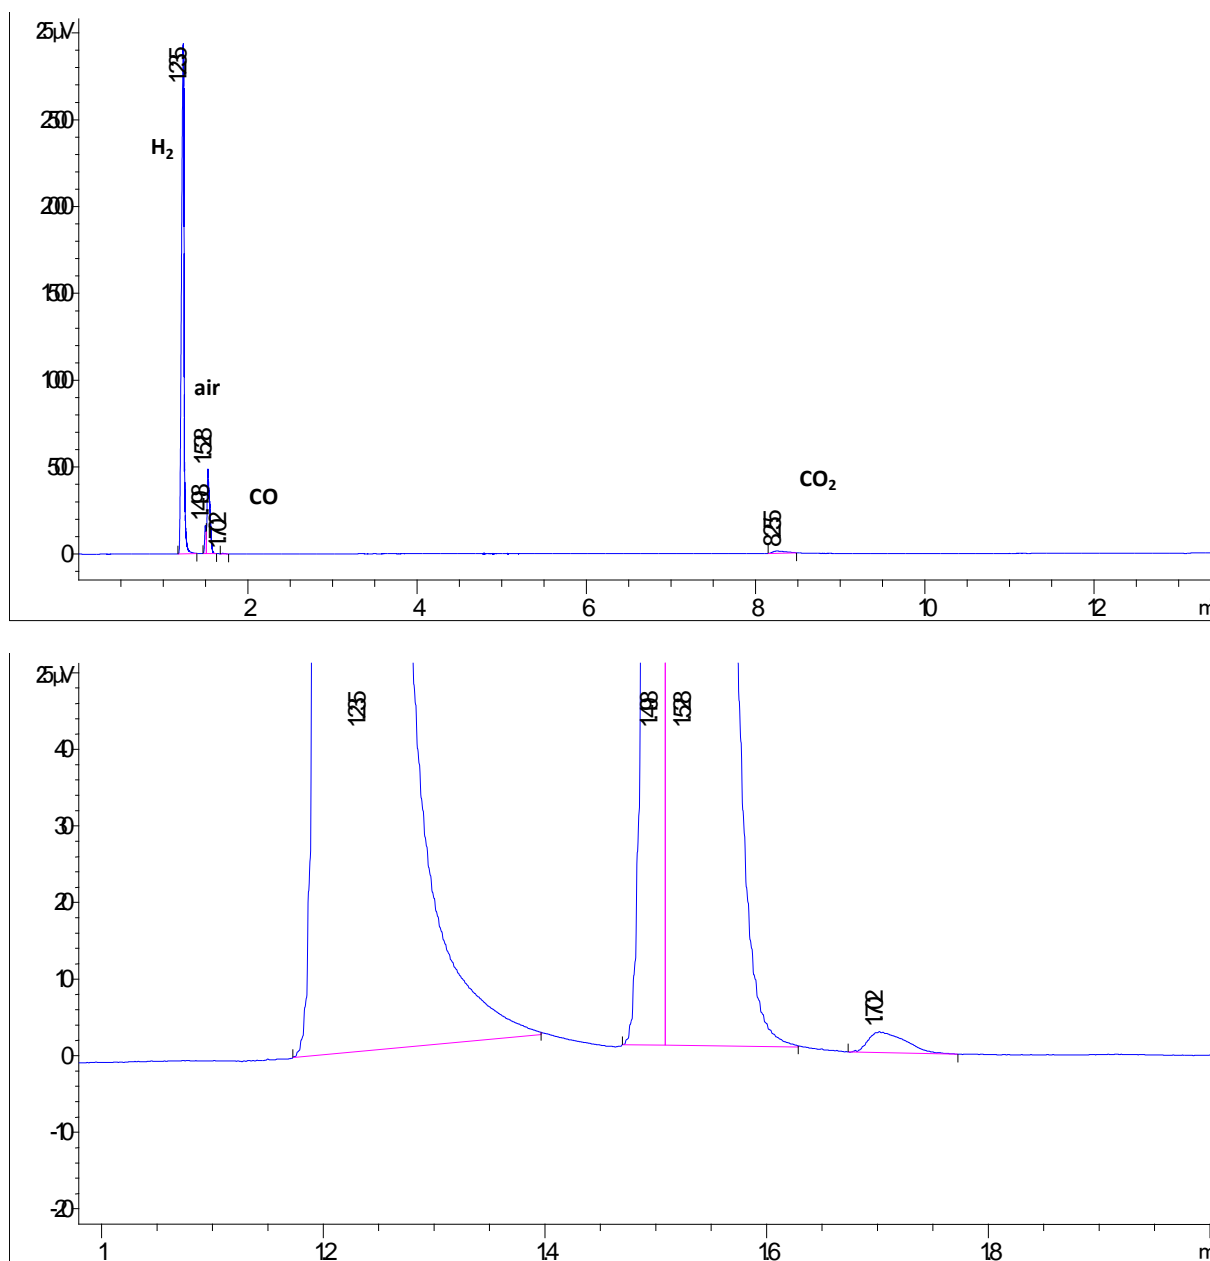

**Figure S9.** GC-TCD spectra of reaction gases.

CO<sub>2</sub> was detected but due to its high solubility in acetonitrile only small amounts were present in the gas phase (confirmed by <sup>13</sup>C NMR spectra).

CO was also detected in very low amount (maximum 172 ppm), that is a selectivity greater than 99.8 % for CO<sub>2</sub> and H<sub>2</sub> at 130°C.

## 6. Computational details and structures

Density functional theory<sup>[7a]</sup> was applied to determine the structural and energetic features of the intermediates and transition states described herein. Calculations were performed using Gaussian09 code.<sup>[7b]</sup> The 6-311+G(d,p) basis set<sup>[7c,d]</sup> was used for atoms C, H, B and O. The hybrid exchange correlation functional M06 was used.<sup>[7e]</sup> All structures were calculated without geometrical constraint; stationary points were characterized by frequency calculations (one negative frequency for a transition state, no negative frequency for minima). Solvent effects (acetonitrile) were included in structure-optimization and frequency calculations using the PCM model implemented in the Gaussian code.<sup>[7f,g]</sup>

### 6.1. Computed pathways for the dehydrogenation of formic acid

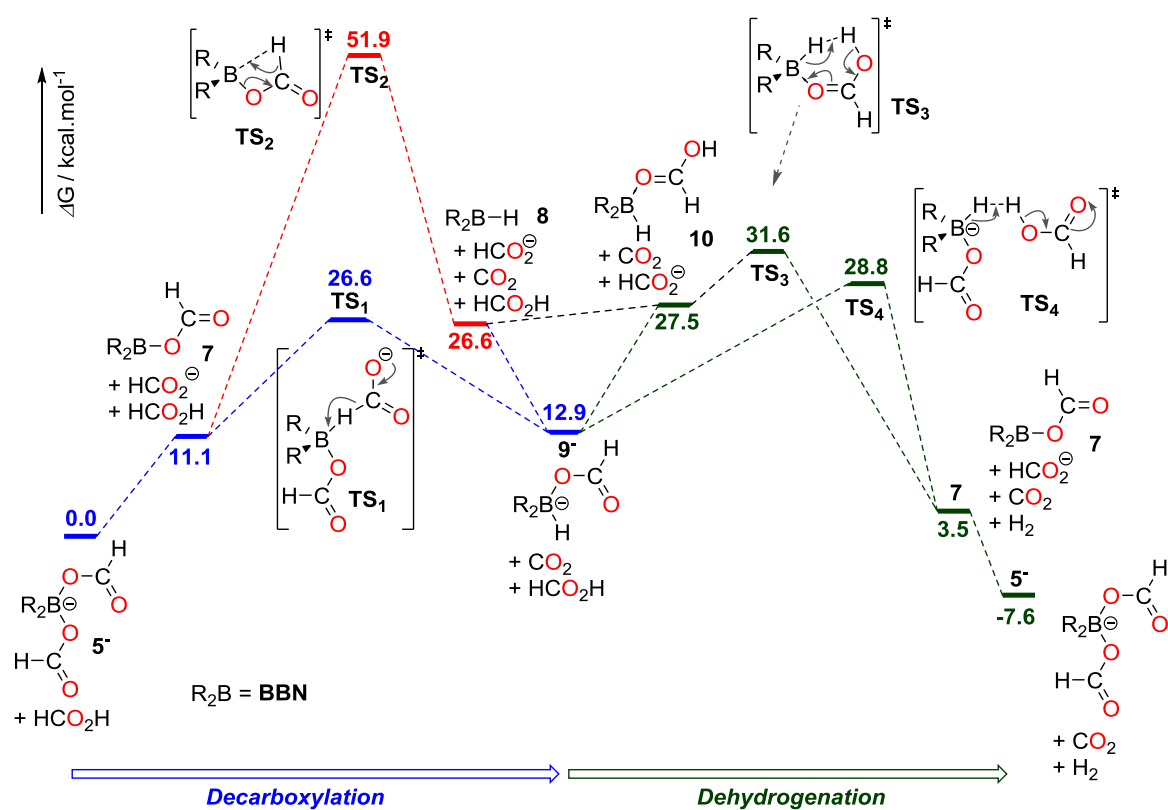

**Scheme S1.** Computed pathways for the dehydrogenation of formic acid catalyzed by BBN-H derivatives in acetonitrile (at the M06-2X/6-311+G(d,p) level of theory).

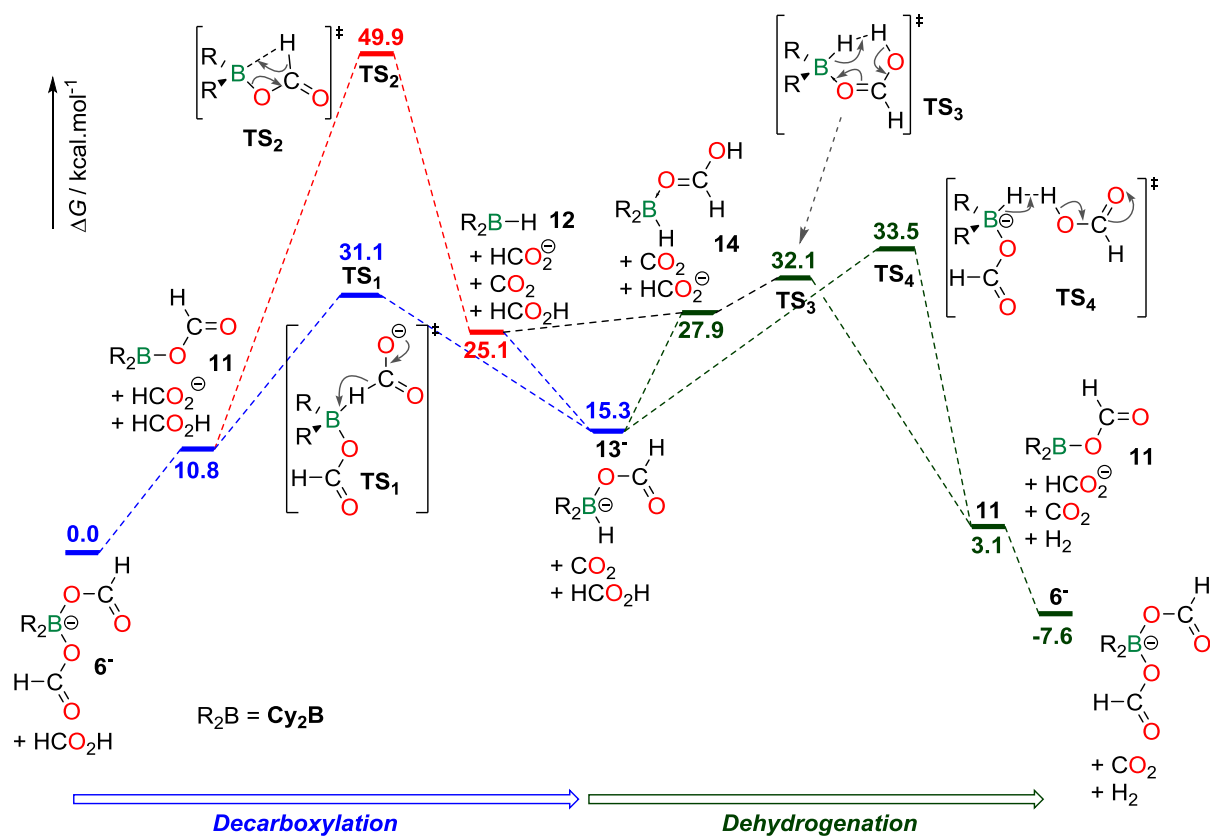

**Scheme S2.** Computed pathways for the dehydrogenation of formic acid catalyzed by  $\text{Cy}_2\text{B-H}$  derivatives in acetonitrile (at the M06-2X/6-311+G(d,p) level of theory).

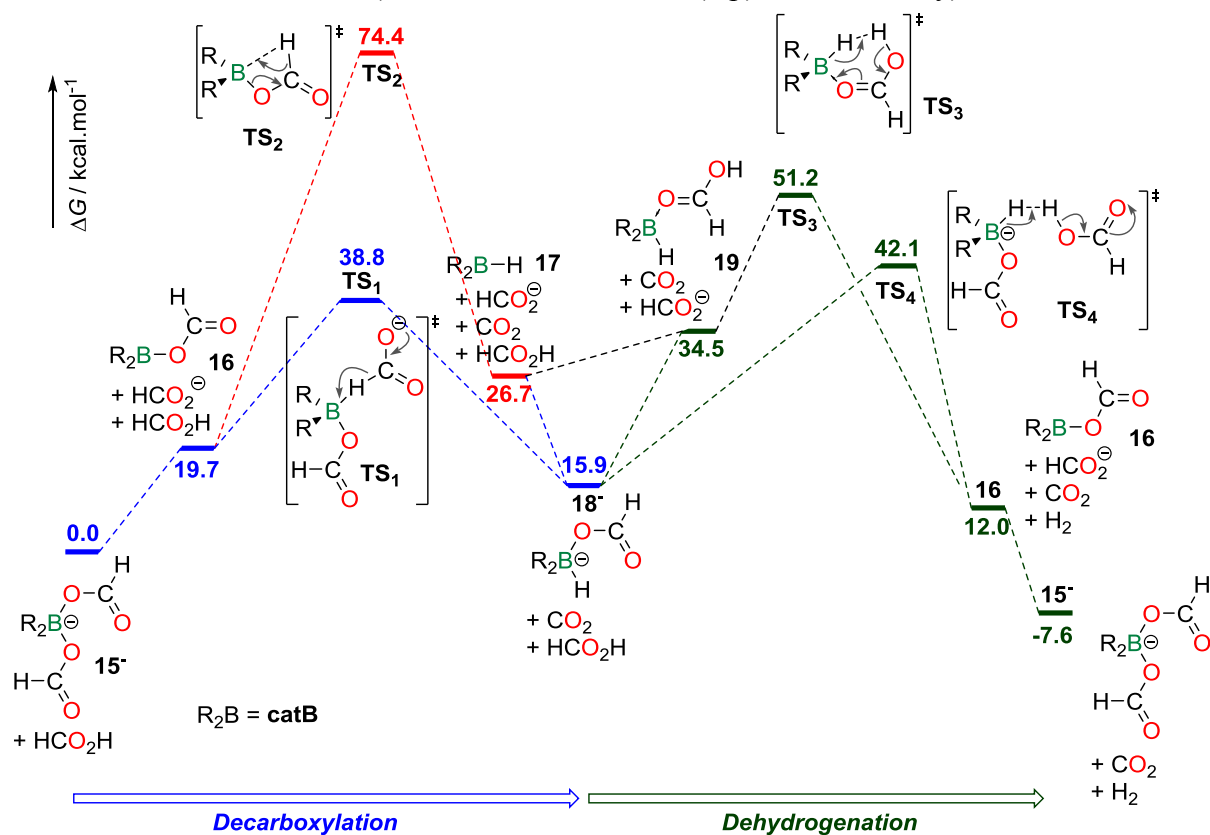

**Scheme S3.** Computed pathways for the dehydrogenation of formic acid catalyzed by  $\text{catB-H}$  derivatives in acetonitrile (at the M06-2X/6-311+G(d,p) level of theory).

## 6.2. HCOOH, HCOO<sup>-</sup>, H<sub>2</sub> and CO<sub>2</sub>

### HCOOH

|                                                          |              |              |              |
|----------------------------------------------------------|--------------|--------------|--------------|
| 6                                                        | 0.124864000  | 0.367270000  | 0.000000000  |
| 1                                                        | 0.040591000  | 1.462147000  | 0.000000000  |
| 8                                                        | 1.166726000  | -0.220876000 | -0.000005000 |
| 8                                                        | -1.042992000 | -0.280322000 | 0.000005000  |
| 1                                                        | -1.779648000 | 0.343820000  | 0.000008000  |
| Sum of electronic and zero-point Energies=               |              |              | -189.720079  |
| Sum of electronic and thermal Energies=                  |              |              | -189.716856  |
| Sum of electronic and thermal Enthalpies=                |              |              | -189.715911  |
| Sum of electronic and thermal Free Energies=             |              |              | -189.744145  |
| Lowest vibration frequency (/ cm <sup>-1</sup> ): 524.69 |              |              |              |

### HCOO<sup>-</sup>

|                                                          |              |              |             |
|----------------------------------------------------------|--------------|--------------|-------------|
| 6                                                        | 0.000000000  | 0.331203000  | 0.000000000 |
| 1                                                        | -0.000045000 | 1.448738000  | 0.000000000 |
| 8                                                        | 1.124378000  | -0.214724000 | 0.000000000 |
| 8                                                        | -1.124372000 | -0.214770000 | 0.000000000 |
| Sum of electronic and zero-point Energies=               |              |              | -189.274822 |
| Sum of electronic and thermal Energies=                  |              |              | -189.271854 |
| Sum of electronic and thermal Enthalpies=                |              |              | -189.270910 |
| Sum of electronic and thermal Free Energies=             |              |              | -189.298621 |
| Lowest vibration frequency (/ cm <sup>-1</sup> ): 758.00 |              |              |             |

### CO<sub>2</sub>

|                                                          |             |             |              |
|----------------------------------------------------------|-------------|-------------|--------------|
| 6                                                        | 0.000000000 | 0.000000000 | 0.000000000  |
| 8                                                        | 0.000000000 | 0.000000000 | 1.154894000  |
| 8                                                        | 0.000000000 | 0.000000000 | -1.154894000 |
| Sum of electronic and zero-point Energies=               |             |             | -188.565905  |
| Sum of electronic and thermal Energies=                  |             |             | -188.563298  |
| Sum of electronic and thermal Enthalpies=                |             |             | -188.562354  |
| Sum of electronic and thermal Free Energies=             |             |             | -188.586584  |
| Lowest vibration frequency (/ cm <sup>-1</sup> ): 682.44 |             |             |              |

### H<sub>2</sub>

|                                                    |             |             |              |
|----------------------------------------------------|-------------|-------------|--------------|
| 1                                                  | 0.000000000 | 0.000000000 | 0.370300000  |
| 1                                                  | 0.000000000 | 0.000000000 | -0.370300000 |
| Sum of electronic and zero-point Energies=         |             |             | -1.158287    |
| Sum of electronic and thermal Energies=            |             |             | -1.155926    |
| Sum of electronic and thermal Enthalpies=          |             |             | -1.154982    |
| Sum of electronic and thermal Free Energies=       |             |             | -1.169768    |
| Vibration frequency (/ cm <sup>-1</sup> ): 4464.39 |             |             |              |

## 6.3. 9-BBN derivatives

### 5<sup>-</sup>

|   |              |              |              |   |              |              |              |
|---|--------------|--------------|--------------|---|--------------|--------------|--------------|
| 6 | 1.059045000  | -1.139198000 | 1.515482000  | 1 | 2.679292000  | -2.387245000 | 0.819012000  |
| 6 | 0.174642000  | 0.055474000  | 1.105951000  | 6 | 2.026701000  | 1.693956000  | 0.250917000  |
| 6 | 1.068444000  | -0.118507000 | -1.321592000 | 1 | 2.941955000  | 1.198069000  | 0.576748000  |
| 6 | 1.996971000  | -1.275876000 | -0.900950000 | 1 | 2.256005000  | 2.765752000  | 0.268079000  |
| 1 | 1.410080000  | -1.017764000 | 2.549505000  | 1 | 0.995910000  | 2.003732000  | -1.612724000 |
| 1 | 2.955693000  | -1.216923000 | -1.435095000 | 1 | 0.433508000  | -2.040163000 | 1.510333000  |
| 1 | 1.522384000  | -2.208502000 | -1.225389000 | 5 | -0.273153000 | -0.163888000 | -0.428656000 |
| 6 | 0.885935000  | 1.418141000  | 1.249224000  | 8 | -1.272175000 | 0.828497000  | -1.029808000 |
| 1 | 0.124696000  | 2.194977000  | 1.122624000  | 6 | -2.138860000 | 1.598098000  | -0.442522000 |
| 1 | 1.277632000  | 1.535655000  | 2.269528000  | 1 | -2.812126000 | 2.060476000  | -1.184686000 |
| 6 | 1.702902000  | 1.277074000  | -1.193147000 | 8 | -2.253928000 | 1.854341000  | 0.737559000  |
| 1 | 2.616898000  | 1.349203000  | -1.798328000 | 8 | -0.910360000 | -1.543643000 | -0.672393000 |
| 1 | -0.689213000 | 0.072497000  | 1.777426000  | 6 | -2.052650000 | -1.908547000 | -0.180323000 |
| 1 | 0.821563000  | -0.270600000 | -2.382898000 | 1 | -2.300570000 | -2.946311000 | -0.458968000 |
| 6 | 2.282052000  | -1.386970000 | 0.611546000  | 8 | -2.811108000 | -1.246297000 | 0.501098000  |
| 1 | 3.081539000  | -0.698470000 | 0.888942000  |   |              |              |              |

Sum of electronic and zero-point Energies= -  
716.350287  
Sum of electronic and thermal Energies= -  
716.336381

Sum of electronic and thermal Enthalpies= -  
716.335437  
Sum of electronic and thermal Free Energies= -  
716.390012  
Lowest vibration frequency (/ cm<sup>-1</sup>): 68.63

### 7

|   |              |              |              |
|---|--------------|--------------|--------------|
| 6 | 0.934049000  | -0.875172000 | 1.631865000  |
| 6 | -0.185722000 | 0.056132000  | 1.101698000  |
| 6 | 0.668253000  | -0.394398000 | -1.327164000 |
| 6 | 1.830405000  | -1.243984000 | -0.762754000 |
| 1 | 1.252963000  | -0.530287000 | 2.621789000  |
| 1 | 2.731003000  | -1.084898000 | -1.367135000 |
| 1 | 1.558250000  | -2.298155000 | -0.889610000 |
| 6 | 0.234557000  | 1.545550000  | 0.965345000  |
| 1 | -0.674224000 | 2.121718000  | 0.756807000  |
| 1 | 0.615912000  | 1.904291000  | 1.928059000  |
| 6 | 0.994213000  | 1.120433000  | -1.467214000 |
| 1 | 1.853032000  | 1.245630000  | -2.135872000 |
| 1 | -1.023445000 | 0.011379000  | 1.801331000  |
| 1 | 0.410154000  | -0.773744000 | -2.320501000 |
| 6 | 2.165209000  | -1.006192000 | 0.721643000  |
| 1 | 2.797520000  | -0.125618000 | 0.829076000  |
| 1 | 2.771846000  | -1.844988000 | 1.076462000  |
| 6 | 1.266125000  | 1.845493000  | -0.138806000 |

|   |              |              |              |
|---|--------------|--------------|--------------|
| 1 | 2.270972000  | 1.610224000  | 0.208812000  |
| 1 | 1.265760000  | 2.923514000  | -0.326116000 |
| 1 | 0.144911000  | 1.606295000  | -1.963969000 |
| 1 | 0.499955000  | -1.871595000 | 1.779766000  |
| 5 | -0.540808000 | -0.421763000 | -0.342950000 |
| 8 | -1.798414000 | -0.815752000 | -0.803216000 |
| 6 | -2.964475000 | -0.513816000 | -0.207724000 |
| 1 | -3.724338000 | -1.272819000 | -0.422642000 |
| 8 | -3.164326000 | 0.476201000  | 0.432861000  |

Sum of electronic and zero-point Energies= -  
527.035464  
Sum of electronic and thermal Energies= -  
527.024174  
Sum of electronic and thermal Enthalpies= -  
527.023230  
Sum of electronic and thermal Free Energies= -  
527.073633  
Lowest vibration frequency (/ cm<sup>-1</sup>): 26.71

### TS<sub>1</sub>

|   |              |              |              |
|---|--------------|--------------|--------------|
| 6 | -0.525586000 | -1.939767000 | -1.169966000 |
| 6 | -0.446656000 | -0.404204000 | -1.306208000 |
| 6 | -0.540341000 | -0.188385000 | 1.290078000  |
| 6 | -0.495549000 | -1.726900000 | 1.415865000  |
| 1 | -1.140485000 | -2.368864000 | -1.973465000 |
| 1 | -1.058976000 | -2.054400000 | 2.300096000  |
| 1 | 0.544961000  | -2.033941000 | 1.578036000  |
| 6 | -1.819776000 | 0.287828000  | -1.409844000 |
| 1 | -1.649140000 | 1.353554000  | -1.593695000 |
| 1 | -2.377404000 | -0.092741000 | -2.277453000 |
| 6 | -1.993803000 | 0.337015000  | 1.197676000  |
| 1 | -2.604945000 | -0.137693000 | 1.979382000  |
| 1 | 0.103517000  | -0.186776000 | -2.231913000 |
| 1 | -0.097238000 | 0.228935000  | 2.204660000  |
| 6 | -1.047183000 | -2.466065000 | 0.183829000  |
| 1 | -2.137535000 | -2.423128000 | 0.204203000  |
| 1 | -0.796500000 | -3.529927000 | 0.264898000  |
| 6 | -2.707374000 | 0.138814000  | -0.159796000 |
| 1 | -3.188403000 | -0.840881000 | -0.187550000 |
| 1 | -3.526758000 | 0.863575000  | -0.226743000 |

|   |              |              |              |
|---|--------------|--------------|--------------|
| 1 | -1.976263000 | 1.404605000  | 1.416025000  |
| 1 | 0.488778000  | -2.331325000 | -1.316835000 |
| 6 | 2.946496000  | -0.402036000 | 0.016026000  |
| 1 | 1.396372000  | -0.534331000 | 0.084529000  |
| 8 | 3.263374000  | -0.239421000 | 1.144267000  |
| 8 | 3.193688000  | -0.545427000 | -1.131533000 |
| 5 | 0.324116000  | 0.170849000  | -0.022426000 |
| 8 | 0.924092000  | 1.560543000  | -0.195117000 |
| 6 | 0.376507000  | 2.727564000  | -0.060307000 |
| 1 | 1.117384000  | 3.528188000  | -0.218015000 |
| 8 | -0.780949000 | 2.989021000  | 0.197614000  |

Sum of electronic and zero-point Energies= -  
716.287104  
Sum of electronic and thermal Energies= -  
716.272726  
Sum of electronic and thermal Enthalpies= -  
716.271782  
Sum of electronic and thermal Free Energies= -  
716.329525  
Lowest vibration frequencies (/ cm<sup>-1</sup>): - 337.60, 36.29

### TS<sub>2</sub>

|   |              |              |              |
|---|--------------|--------------|--------------|
| 6 | -0.853836000 | 1.299810000  | 1.295054000  |
| 6 | -0.196465000 | -0.098690000 | 1.312008000  |
| 6 | -0.196811000 | -0.097844000 | -1.312204000 |
| 6 | -0.853929000 | 1.300748000  | -1.294195000 |
| 1 | -1.535286000 | 1.401759000  | 2.147620000  |
| 1 | -1.535333000 | 1.403541000  | -2.146694000 |
| 1 | -0.059777000 | 2.041553000  | -1.445688000 |
| 6 | -1.192824000 | -1.281055000 | 1.295609000  |
| 1 | -0.616836000 | -2.202109000 | 1.448787000  |
| 1 | -1.880137000 | -1.203326000 | 2.145816000  |
| 6 | -1.193291000 | -1.280126000 | -1.296265000 |
| 1 | -1.880904000 | -1.201718000 | -2.146167000 |
| 1 | 0.397685000  | -0.177904000 | 2.229259000  |
| 1 | 0.397089000  | -0.176606000 | -2.229652000 |
| 6 | -1.608126000 | 1.657861000  | 0.000578000  |
| 1 | -2.590266000 | 1.185546000  | 0.000445000  |
| 1 | -1.803781000 | 2.734681000  | 0.000978000  |

|   |              |              |              |
|---|--------------|--------------|--------------|
| 6 | -2.011571000 | -1.431451000 | -0.000233000 |
| 1 | -2.838803000 | -0.722381000 | 0.000170000  |
| 1 | -2.478312000 | -2.421501000 | -0.000501000 |
| 1 | -0.617440000 | -2.201118000 | -1.450342000 |
| 1 | -0.059844000 | 2.040650000  | 1.447192000  |
| 5 | 0.665964000  | -0.228501000 | -0.000247000 |
| 8 | 3.673406000  | -0.649244000 | -0.000092000 |
| 6 | 2.660393000  | -0.087451000 | -0.000143000 |
| 8 | 1.946381000  | 0.893667000  | 0.000027000  |
| 1 | 1.492587000  | -1.204754000 | -0.000723000 |

Sum of electronic and zero-point Energies= -  
526.972605  
Sum of electronic and thermal Energies= -  
526.962048  
Sum of electronic and thermal Enthalpies= -  
526.961104

Sum of electronic and thermal Free Energies= -  
527.008696

Lowest vibration frequencies (/ cm<sup>-1</sup>): - 507.52, 76.12

## 8

|   |              |              |              |
|---|--------------|--------------|--------------|
| 6 | 1.283244000  | 1.287056000  | -0.187030000 |
| 6 | 0.005518000  | 1.300786000  | 0.710872000  |
| 6 | 0.002650000  | -1.300667000 | 0.710958000  |
| 6 | 1.279484000  | -1.290265000 | -0.188114000 |
| 1 | 1.253094000  | 2.150409000  | -0.861332000 |
| 1 | 1.245939000  | -2.152808000 | -0.863310000 |
| 1 | 2.151236000  | -1.443787000 | 0.460067000  |
| 6 | -1.321311000 | 1.290341000  | -0.077894000 |
| 1 | -2.133451000 | 1.447267000  | 0.642012000  |
| 1 | -1.352059000 | 2.146251000  | -0.762465000 |
| 6 | -1.324889000 | -1.287158000 | -0.076594000 |
| 1 | -1.358801000 | -2.143745000 | -0.760163000 |
| 1 | 0.044904000  | 2.219806000  | 1.302600000  |
| 1 | 0.040293000  | -2.219633000 | 1.302891000  |
| 6 | 1.498359000  | -0.001542000 | -0.999494000 |
| 1 | 0.859121000  | -0.000170000 | -1.881343000 |
| 1 | 2.523870000  | -0.002889000 | -1.381655000 |

|   |              |              |              |
|---|--------------|--------------|--------------|
| 6 | -1.612290000 | 0.001566000  | -0.863618000 |
| 1 | -1.051221000 | 0.000242000  | -1.797358000 |
| 1 | -2.666792000 | 0.002897000  | -1.157034000 |
| 1 | -2.136940000 | -1.440718000 | 0.644145000  |
| 1 | 2.154980000  | 1.437033000  | 0.462032000  |
| 5 | 0.189001000  | -0.000076000 | 1.559979000  |
| 1 | 0.616230000  | -0.000478000 | 2.676498000  |

Sum of electronic and zero-point Energies= -  
338.429544

Sum of electronic and thermal Energies= -  
338.421224

Sum of electronic and thermal Enthalpies= -  
338.420280

Sum of electronic and thermal Free Energies= -  
338.462437

Lowest vibration frequency (/ cm<sup>-1</sup>): 41.87

## 9

|   |              |              |              |
|---|--------------|--------------|--------------|
| 6 | 1.159199000  | -1.756657000 | 0.481039000  |
| 6 | -0.097124000 | -0.892396000 | 0.703186000  |
| 6 | 0.692150000  | 0.712991000  | -1.175172000 |
| 6 | 1.936843000  | -0.164471000 | -1.405190000 |
| 1 | 1.516003000  | -2.183077000 | 1.430108000  |
| 1 | 2.803972000  | 0.445871000  | -1.696414000 |
| 1 | 1.724455000  | -0.822300000 | -2.258080000 |
| 6 | 0.092954000  | 0.228156000  | 1.741853000  |
| 1 | -0.890595000 | 0.680534000  | 1.924678000  |
| 1 | 0.424417000  | -0.180907000 | 2.707582000  |
| 6 | 0.895515000  | 1.827253000  | -0.129407000 |
| 1 | 1.755169000  | 2.461412000  | -0.391755000 |
| 1 | -0.877436000 | -1.559010000 | 1.092508000  |
| 1 | 0.474589000  | 1.212999000  | -2.131079000 |
| 6 | 2.339349000  | -1.046657000 | -0.208943000 |
| 1 | 2.885642000  | -0.446636000 | 0.520365000  |
| 1 | 3.054507000  | -1.803401000 | -0.552635000 |
| 6 | 1.065457000  | 1.348296000  | 1.325289000  |
| 1 | 2.093435000  | 1.019644000  | 1.487971000  |

|   |              |              |              |
|---|--------------|--------------|--------------|
| 1 | 0.927499000  | 2.204474000  | 1.996356000  |
| 1 | 0.011936000  | 2.475191000  | -0.170522000 |
| 1 | 0.865103000  | -2.609796000 | -0.144253000 |
| 5 | -0.532557000 | -0.251992000 | -0.725255000 |
| 8 | -1.788619000 | 0.662105000  | -0.581078000 |
| 6 | -2.949391000 | 0.206450000  | -0.255365000 |
| 1 | -3.703919000 | 1.010140000  | -0.194228000 |
| 8 | -3.264045000 | -0.951185000 | -0.030119000 |
| 1 | -0.790388000 | -1.110323000 | -1.568488000 |

Sum of electronic and zero-point Energies= -  
527.746017

Sum of electronic and thermal Energies= -  
527.734893

Sum of electronic and thermal Enthalpies= -  
527.733949

Sum of electronic and thermal Free Energies= -  
527.782793

Lowest vibration frequency (/ cm<sup>-1</sup>): 48.37

## 10

|   |              |              |              |
|---|--------------|--------------|--------------|
| 6 | 1.136280000  | -1.600970000 | 0.907713000  |
| 6 | -0.009565000 | -0.573971000 | 1.026261000  |
| 6 | 0.594044000  | 0.356459000  | -1.329044000 |
| 6 | 1.743161000  | -0.668719000 | -1.433840000 |
| 1 | 1.589316000  | -1.783246000 | 1.890677000  |
| 1 | 2.592776000  | -0.237582000 | -1.978950000 |
| 1 | 1.382818000  | -1.508521000 | -2.040982000 |
| 6 | 0.406879000  | 0.769611000  | 1.657277000  |
| 1 | -0.505797000 | 1.351324000  | 1.836398000  |
| 1 | 0.859646000  | 0.603998000  | 2.643529000  |
| 6 | 0.997406000  | 1.697354000  | -0.684300000 |
| 1 | 1.833790000  | 2.150813000  | -1.232235000 |
| 1 | -0.765143000 | -1.018580000 | 1.689880000  |
| 1 | 0.264049000  | 0.574012000  | -2.353257000 |
| 6 | 2.249659000  | -1.229234000 | -0.090197000 |
| 1 | 2.935257000  | -0.517411000 | 0.370744000  |
| 1 | 2.851537000  | -2.122288000 | -0.290076000 |
| 6 | 1.365454000  | 1.624724000  | 0.808757000  |
| 1 | 2.385575000  | 1.255552000  | 0.920083000  |

Lowest vibration frequency (/ cm<sup>-1</sup>): 53.91

|   |              |              |              |
|---|--------------|--------------|--------------|
| 1 | 1.380222000  | 2.641600000  | 1.215693000  |
| 1 | 0.151405000  | 2.386156000  | -0.795512000 |
| 1 | 0.695292000  | -2.554191000 | 0.590128000  |
| 5 | -0.558856000 | -0.340151000 | -0.467623000 |
| 8 | -1.807255000 | 0.704328000  | -0.375319000 |
| 6 | -2.952125000 | 0.310317000  | -0.146888000 |
| 1 | -3.769592000 | 1.019700000  | -0.035969000 |
| 8 | -3.287093000 | -0.931969000 | -0.022069000 |
| 1 | -1.024030000 | -1.348387000 | -0.994871000 |
| 1 | -2.495218000 | -1.484499000 | -0.212488000 |

Sum of electronic and zero-point Energies= -  
528.169564

Sum of electronic and thermal Energies= -  
528.158367

Sum of electronic and thermal Enthalpies= -  
528.157423

Sum of electronic and thermal Free Energies= -  
528.206318

### TS<sub>3</sub>

|   |              |              |              |
|---|--------------|--------------|--------------|
| 6 | -1.471020000 | -1.005297000 | -1.391628000 |
| 6 | -0.445763000 | 0.145928000  | -1.353951000 |
| 6 | -0.045690000 | -0.313428000 | 1.187116000  |
| 6 | -1.073726000 | -1.461948000 | 1.129609000  |
| 1 | -2.281027000 | -0.769597000 | -2.092223000 |
| 1 | -1.623715000 | -1.525297000 | 2.076268000  |
| 1 | -0.515622000 | -2.402355000 | 1.037281000  |
| 6 | -1.048228000 | 1.523943000  | -0.995222000 |
| 1 | -0.264207000 | 2.276136000  | -1.141490000 |
| 1 | -1.852023000 | 1.775647000  | -1.697771000 |
| 6 | -0.649769000 | 1.069098000  | 1.522045000  |
| 1 | -1.190779000 | 1.023450000  | 2.474889000  |
| 1 | -0.002772000 | 0.232379000  | -2.353345000 |
| 1 | 0.678029000  | -0.552961000 | 1.977001000  |
| 6 | -2.084354000 | -1.382748000 | -0.029703000 |
| 1 | -2.881320000 | -0.683103000 | 0.221923000  |
| 1 | -2.575009000 | -2.356514000 | -0.128677000 |
| 6 | -1.582114000 | 1.653602000  | 0.444152000  |
| 1 | -2.566628000 | 1.191251000  | 0.517018000  |

|   |              |              |              |
|---|--------------|--------------|--------------|
| 1 | -1.742709000 | 2.714698000  | 0.660572000  |
| 1 | 0.182075000  | 1.767148000  | 1.673428000  |
| 1 | -0.963491000 | -1.889700000 | -1.797480000 |
| 5 | 0.641933000  | -0.185384000 | -0.244075000 |
| 8 | 1.819737000  | 0.779014000  | -0.259762000 |
| 6 | 2.985839000  | 0.289206000  | -0.080019000 |
| 1 | 3.814130000  | 0.996696000  | -0.034920000 |
| 8 | 3.179125000  | -0.934535000 | 0.023126000  |
| 1 | 1.978640000  | -1.324797000 | -0.276644000 |
| 1 | 1.094819000  | -1.412137000 | -0.596763000 |

Sum of electronic and zero-point Energies= -  
528.162127  
Sum of electronic and thermal Energies= -  
528.151386  
Sum of electronic and thermal Enthalpies= -  
528.150442  
Sum of electronic and thermal Free Energies= -  
528.198471  
Lowest vibration frequencies (/ cm<sup>-1</sup>): - 1270.19, 52.72

### TS<sub>4</sub>

|   |              |              |              |
|---|--------------|--------------|--------------|
| 6 | -1.958806000 | -1.230501000 | -1.421229000 |
| 6 | -1.511594000 | 0.235650000  | -1.285270000 |
| 6 | -0.265603000 | -0.332877000 | 0.936180000  |
| 6 | -0.699122000 | -1.803674000 | 0.763642000  |
| 1 | -2.961611000 | -1.282105000 | -1.862021000 |
| 1 | -0.868898000 | -2.255577000 | 1.748661000  |
| 1 | 0.152388000  | -2.337078000 | 0.324817000  |
| 6 | -2.490421000 | 1.130284000  | -0.484573000 |
| 1 | -2.142552000 | 2.165892000  | -0.576747000 |
| 1 | -3.486094000 | 1.096061000  | -0.942831000 |
| 6 | -1.269765000 | 0.544329000  | 1.722164000  |
| 1 | -1.458567000 | 0.104122000  | 2.708428000  |
| 1 | -1.434351000 | 0.662606000  | -2.292381000 |
| 1 | 0.674039000  | -0.351040000 | 1.499032000  |
| 6 | -1.942864000 | -2.040761000 | -0.112070000 |
| 1 | -2.846351000 | -1.833425000 | 0.461887000  |
| 1 | -1.994324000 | -3.106044000 | -0.359664000 |
| 6 | -2.614962000 | 0.789507000  | 1.011850000  |
| 1 | -3.262261000 | -0.077839000 | 1.139812000  |
| 1 | -3.129685000 | 1.614519000  | 1.514790000  |
| 1 | -0.797394000 | 1.517637000  | 1.909798000  |

|   |              |              |              |
|---|--------------|--------------|--------------|
| 1 | -1.287947000 | -1.720756000 | -2.138455000 |
| 5 | -0.133725000 | 0.343051000  | -0.497421000 |
| 8 | 2.045711000  | 3.111106000  | -0.061425000 |
| 6 | 1.443980000  | 2.086195000  | 0.147355000  |
| 1 | 1.593830000  | 1.487822000  | 1.052067000  |
| 8 | 0.537444000  | 1.618771000  | -0.692480000 |
| 1 | 0.580740000  | -0.636662000 | -1.412365000 |
| 1 | 1.262051000  | -0.529118000 | -0.994499000 |
| 8 | 2.814175000  | -0.248443000 | -0.397701000 |
| 6 | 3.319527000  | -1.295646000 | 0.093904000  |
| 1 | 4.337335000  | -1.171233000 | 0.526083000  |
| 8 | 2.812176000  | -2.426192000 | 0.145227000  |

Sum of electronic and zero-point Energies= -  
717.456902  
Sum of electronic and thermal Energies= -  
717.441000  
Sum of electronic and thermal Enthalpies= -  
717.440055  
Sum of electronic and thermal Free Energies= -  
717.501756  
Lowest vibration frequencies (/ cm<sup>-1</sup>): -239.09, 49.43

## 6.4. Cy<sub>2</sub>B derivatives

### 6<sup>-</sup>

|   |              |              |              |
|---|--------------|--------------|--------------|
| 5 | 0.000014000  | 0.000035000  | -0.658033000 |
| 8 | 0.239404000  | -1.132572000 | -1.685783000 |
| 8 | -0.239417000 | 1.132676000  | -1.685739000 |
| 6 | -0.084131000 | 2.407031000  | -1.533079000 |
| 1 | -0.315191000 | 2.947354000  | -2.466862000 |
| 6 | 0.083728000  | -2.406907000 | -1.533388000 |
| 1 | 0.314508000  | -2.947101000 | -2.467317000 |
| 8 | -0.264989000 | -3.016336000 | -0.538817000 |
| 8 | 0.264534000  | 3.016353000  | -0.538426000 |
| 6 | -1.361328000 | -0.241796000 | 0.190539000  |
| 6 | -1.674978000 | 0.901185000  | 1.168076000  |
| 6 | -2.584917000 | -0.495705000 | -0.703638000 |
| 1 | -1.213150000 | -1.148326000 | 0.792880000  |
| 6 | -2.939135000 | 0.629684000  | 1.990335000  |
| 1 | -1.810453000 | 1.835547000  | 0.607663000  |
| 1 | -0.824275000 | 1.066598000  | 1.838143000  |

|   |              |              |              |
|---|--------------|--------------|--------------|
| 6 | -3.855598000 | -0.771616000 | 0.105305000  |
| 1 | -2.753679000 | 0.386571000  | -1.336565000 |
| 1 | -2.390111000 | -1.333837000 | -1.381428000 |
| 6 | -4.143391000 | 0.369578000  | 1.083162000  |
| 1 | -3.148872000 | 1.466945000  | 2.664445000  |
| 1 | -2.771803000 | -0.253250000 | 2.621114000  |
| 1 | -4.712401000 | -0.924309000 | -0.559692000 |
| 1 | -3.722656000 | -1.702626000 | 0.671779000  |
| 1 | -5.033409000 | 0.147369000  | 1.680440000  |
| 1 | -4.363243000 | 1.281063000  | 0.512096000  |
| 6 | 1.361387000  | 0.241788000  | 0.190517000  |
| 6 | 1.675261000  | -0.901542000 | 1.167579000  |
| 6 | 2.584854000  | 0.496209000  | -0.703676000 |
| 1 | 1.213140000  | 1.148065000  | 0.793222000  |
| 6 | 2.939489000  | -0.630263000 | 1.989799000  |
| 1 | 1.810746000  | -1.835675000 | 0.606784000  |



|   |             |              |              |
|---|-------------|--------------|--------------|
| 1 | 0.824654000 | -1.067292000 | 1.837684000  |
| 6 | 3.855597000 | 0.771900000  | 0.105243000  |
| 1 | 2.753636000 | -0.385771000 | -1.337009000 |
| 1 | 2.389872000 | 1.334620000  | -1.381072000 |
| 6 | 4.143612000 | -0.369675000 | 1.082588000  |
| 1 | 3.149386000 | -1.467782000 | 2.663540000  |
| 1 | 2.772158000 | 0.252398000  | 2.620961000  |
| 1 | 4.712311000 | 0.924954000  | -0.559786000 |
| 1 | 3.722633000 | 1.702660000  | 0.672124000  |
| 1 | 5.033683000 | -0.147630000 | 1.679847000  |

**11**

|   |              |              |              |
|---|--------------|--------------|--------------|
| 6 | -0.466192000 | 3.004293000  | -0.292650000 |
| 1 | -1.517782000 | 2.761383000  | -0.099038000 |
| 8 | -0.078756000 | 4.112465000  | -0.518819000 |
| 8 | 0.378553000  | 1.964552000  | -0.224082000 |
| 5 | -0.001593000 | 0.614351000  | -0.158139000 |
| 6 | -1.498262000 | 0.159102000  | -0.315610000 |
| 6 | -1.681462000 | -1.199981000 | -1.015342000 |
| 6 | -2.062649000 | 0.084760000  | 1.128731000  |
| 1 | -2.100760000 | 0.889245000  | -0.870488000 |
| 6 | -3.147841000 | -1.641133000 | -1.003081000 |
| 1 | -1.077397000 | -1.960679000 | -0.506562000 |
| 1 | -1.317950000 | -1.143291000 | -2.045643000 |
| 6 | -3.525288000 | -0.365201000 | 1.138327000  |
| 1 | -1.462535000 | -0.629793000 | 1.707796000  |
| 1 | -1.969141000 | 1.052391000  | 1.633581000  |
| 6 | -3.695137000 | -1.706110000 | 0.423746000  |
| 1 | -3.249679000 | -2.613342000 | -1.493312000 |
| 1 | -3.742355000 | -0.926118000 | -1.585034000 |
| 1 | -3.886357000 | -0.433647000 | 2.168208000  |
| 1 | -4.133661000 | 0.394468000  | 0.633132000  |
| 1 | -4.748665000 | -1.998801000 | 0.413527000  |
| 1 | -3.153727000 | -2.481089000 | 0.980404000  |
| 6 | 1.190399000  | -0.361885000 | 0.140494000  |
| 6 | 1.932833000  | -0.660864000 | -1.185433000 |

**TS<sub>1</sub>**

|   |              |              |              |
|---|--------------|--------------|--------------|
| 6 | -0.218659000 | 1.991367000  | -1.949431000 |
| 1 | 0.058742000  | 0.722293000  | -1.129411000 |
| 8 | 0.861389000  | 2.371140000  | -2.260576000 |
| 8 | -1.398776000 | 2.094188000  | -1.986307000 |
| 5 | 0.044106000  | 0.371743000  | 0.133083000  |
| 8 | -0.010802000 | 1.737983000  | 0.814186000  |
| 6 | 0.074524000  | 1.887952000  | 2.099210000  |
| 1 | 0.065265000  | 2.951786000  | 2.383436000  |
| 8 | 0.152453000  | 1.011355000  | 2.938968000  |
| 6 | 1.465790000  | -0.355859000 | 0.386087000  |
| 6 | 1.632201000  | -1.664194000 | -0.400983000 |
| 6 | 2.667626000  | 0.562655000  | 0.115796000  |
| 1 | 1.491341000  | -0.622847000 | 1.455301000  |
| 6 | 2.973158000  | -2.351413000 | -0.123917000 |
| 1 | 1.558805000  | -1.449396000 | -1.477673000 |
| 1 | 0.814800000  | -2.352988000 | -0.163495000 |
| 6 | 4.008564000  | -0.118163000 | 0.402166000  |
| 1 | 2.641904000  | 0.875636000  | -0.936828000 |
| 1 | 2.582427000  | 1.479309000  | 0.709640000  |
| 6 | 4.148305000  | -1.412696000 | -0.401498000 |
| 1 | 3.065938000  | -3.263657000 | -0.722426000 |
| 1 | 3.003648000  | -2.657488000 | 0.929830000  |
| 1 | 4.840125000  | 0.558075000  | 0.178271000  |
| 1 | 4.069084000  | -0.355637000 | 1.472243000  |
| 1 | 5.097074000  | -1.908314000 | -0.173840000 |
| 1 | 4.165063000  | -1.168577000 | -1.471690000 |

|                                                         |             |              |             |
|---------------------------------------------------------|-------------|--------------|-------------|
| 1                                                       | 4.363477000 | -1.280904000 | 0.511119000 |
| Sum of electronic and zero-point Energies= -            |             |              |             |
| 873.463224                                              |             |              |             |
| Sum of electronic and thermal Energies= -               |             |              |             |
| 873.443977                                              |             |              |             |
| Sum of electronic and thermal Enthalpies= -             |             |              |             |
| 873.443033                                              |             |              |             |
| Sum of electronic and thermal Free Energies= -          |             |              |             |
| 873.510453                                              |             |              |             |
| Lowest vibration frequency (/ cm <sup>-1</sup> ): 48.64 |             |              |             |

|                                                         |             |              |              |
|---------------------------------------------------------|-------------|--------------|--------------|
| 6                                                       | 2.180134000 | 0.187672000  | 1.182748000  |
| 1                                                       | 0.796146000 | -1.316915000 | 0.512697000  |
| 6                                                       | 3.110587000 | -1.612917000 | -0.959775000 |
| 1                                                       | 2.308257000 | 0.282559000  | -1.602386000 |
| 1                                                       | 1.243917000 | -1.084802000 | -1.923123000 |
| 6                                                       | 3.351579000 | -0.770559000 | 1.406246000  |
| 1                                                       | 2.565283000 | 1.152803000  | 0.834167000  |
| 1                                                       | 1.662488000 | 0.377807000  | 2.128814000  |
| 6                                                       | 4.076763000 | -1.062879000 | 0.091176000  |
| 1                                                       | 3.634803000 | -1.788030000 | -1.903632000 |
| 1                                                       | 2.724028000 | -2.582064000 | -0.621650000 |
| 1                                                       | 4.048000000 | -0.352026000 | 2.138523000  |
| 1                                                       | 2.973412000 | -1.711255000 | 1.825519000  |
| 1                                                       | 4.896180000 | -1.768024000 | 0.255882000  |
| 1                                                       | 4.524321000 | -0.134462000 | -0.284928000 |
| Sum of electronic and zero-point Energies= -            |             |              |              |
| 684.149111                                              |             |              |              |
| Sum of electronic and thermal Energies= -               |             |              |              |
| 684.132885                                              |             |              |              |
| Sum of electronic and thermal Enthalpies= -             |             |              |              |
| 684.131941                                              |             |              |              |
| Sum of electronic and thermal Free Energies= -          |             |              |              |
| 684.194617                                              |             |              |              |
| Lowest vibration frequency (/ cm <sup>-1</sup> ): 19.39 |             |              |              |

|                                                                    |              |              |              |
|--------------------------------------------------------------------|--------------|--------------|--------------|
| 6                                                                  | -1.311852000 | -0.504680000 | 0.316963000  |
| 6                                                                  | -2.513248000 | 0.284725000  | 0.861906000  |
| 6                                                                  | -1.739252000 | -1.200983000 | -0.989374000 |
| 1                                                                  | -1.091540000 | -1.302755000 | 1.048573000  |
| 6                                                                  | -3.749910000 | -0.598014000 | 1.057615000  |
| 1                                                                  | -2.750361000 | 1.091019000  | 0.155340000  |
| 1                                                                  | -2.255641000 | 0.762611000  | 1.811351000  |
| 6                                                                  | -2.961321000 | -2.103776000 | -0.802490000 |
| 1                                                                  | -1.983030000 | -0.424263000 | -1.725655000 |
| 1                                                                  | -0.909651000 | -1.776191000 | -1.410222000 |
| 6                                                                  | -4.141472000 | -1.310812000 | -0.238330000 |
| 1                                                                  | -4.590896000 | -0.002911000 | 1.429059000  |
| 1                                                                  | -3.531081000 | -1.351938000 | 1.825375000  |
| 1                                                                  | -3.240874000 | -2.573999000 | -1.751077000 |
| 1                                                                  | -2.708565000 | -2.914677000 | -0.106872000 |
| 1                                                                  | -5.001390000 | -1.966638000 | -0.069672000 |
| 1                                                                  | -4.452538000 | -0.561162000 | -0.977456000 |
| Sum of electronic and zero-point Energies= -                       |              |              |              |
| 873.412471                                                         |              |              |              |
| Sum of electronic and thermal Energies= -                          |              |              |              |
| 873.393153                                                         |              |              |              |
| Sum of electronic and thermal Enthalpies= -                        |              |              |              |
| 873.392209                                                         |              |              |              |
| Sum of electronic and thermal Free Energies= -                     |              |              |              |
| 873.460790                                                         |              |              |              |
| Lowest vibration frequencies (/ cm <sup>-1</sup> ): -430.19, 37.57 |              |              |              |

## TS<sub>2</sub>

|   |              |              |              |
|---|--------------|--------------|--------------|
| 6 | -0.074304000 | 2.515782000  | 0.083913000  |
| 1 | 0.181928000  | 1.403123000  | -1.067916000 |
| 8 | 0.013647000  | 3.557433000  | -0.418618000 |
| 8 | -0.253006000 | 1.755568000  | 1.009238000  |
| 5 | 0.016292000  | 0.507948000  | -0.161511000 |
| 6 | -1.356221000 | -0.255987000 | -0.369788000 |
| 6 | -1.652539000 | -1.200994000 | 0.809324000  |
| 6 | -2.556357000 | 0.669851000  | -0.623501000 |
| 1 | -1.226387000 | -0.880087000 | -1.268524000 |
| 6 | -2.956643000 | -1.977218000 | 0.607395000  |
| 1 | -1.726293000 | -0.607609000 | 1.731224000  |
| 1 | -0.822068000 | -1.899752000 | 0.951584000  |
| 6 | -3.854776000 | -0.112426000 | -0.832640000 |
| 1 | -2.689655000 | 1.333400000  | 0.241738000  |
| 1 | -2.358660000 | 1.311625000  | -1.489753000 |
| 6 | -4.133671000 | -1.033189000 | 0.356968000  |
| 1 | -3.157551000 | -2.611377000 | 1.475883000  |
| 1 | -2.842876000 | -2.644155000 | -0.256384000 |
| 1 | -4.690650000 | 0.576459000  | -0.984698000 |
| 1 | -3.767428000 | -0.716804000 | -1.743971000 |
| 1 | -5.050701000 | -1.604701000 | 0.188088000  |
| 1 | -4.299935000 | -0.420677000 | 1.252271000  |
| 6 | 1.390243000  | -0.186354000 | 0.209458000  |
| 6 | 1.718125000  | -1.298397000 | -0.804060000 |

|   |             |              |              |
|---|-------------|--------------|--------------|
| 6 | 2.576552000 | 0.784343000  | 0.323624000  |
| 1 | 1.256564000 | -0.664957000 | 1.193332000  |
| 6 | 3.023102000 | -2.019968000 | -0.458606000 |
| 1 | 1.809057000 | -0.852485000 | -1.804408000 |
| 1 | 0.895317000 | -2.018559000 | -0.855322000 |
| 6 | 3.879178000 | 0.061972000  | 0.674568000  |
| 1 | 2.704983000 | 1.302079000  | -0.637635000 |
| 1 | 2.370985000 | 1.554047000  | 1.075437000  |
| 6 | 4.189026000 | -1.035500000 | -0.344921000 |
| 1 | 3.241590000 | -2.783979000 | -1.210416000 |
| 1 | 2.897809000 | -2.539431000 | 0.499572000  |
| 1 | 4.705911000 | 0.775973000  | 0.728706000  |
| 1 | 3.779268000 | -0.389588000 | 1.669309000  |
| 1 | 5.106788000 | -1.563271000 | -0.070992000 |
| 1 | 4.365120000 | -0.574510000 | -1.324925000 |

Sum of electronic and zero-point Energies= -  
684.088834

Sum of electronic and thermal Energies= -  
684.073260

Sum of electronic and thermal Enthalpies= -  
684.072316

Sum of electronic and thermal Free Energies= -  
684.132303

Lowest vibration frequencies (/ cm<sup>-1</sup>): -503.77, 37.67

## 12

|   |              |              |              |
|---|--------------|--------------|--------------|
| 5 | -0.001168000 | -0.025472000 | 0.810238000  |
| 1 | 0.001581000  | -0.040041000 | 2.012625000  |
| 6 | 1.347723000  | 0.210904000  | 0.053534000  |
| 6 | 2.364322000  | 1.107004000  | 0.774806000  |
| 6 | 1.945845000  | -1.209635000 | -0.140859000 |
| 1 | 1.161416000  | 0.614686000  | -0.952957000 |
| 6 | 3.706159000  | 1.161932000  | 0.041723000  |
| 1 | 2.523006000  | 0.712421000  | 1.787189000  |
| 1 | 1.958042000  | 2.116576000  | 0.892909000  |
| 6 | 3.288480000  | -1.150594000 | -0.876251000 |
| 1 | 2.099995000  | -1.677046000 | 0.841176000  |
| 1 | 1.246078000  | -1.846723000 | -0.691318000 |
| 6 | 4.282241000  | -0.242519000 | -0.149284000 |
| 1 | 4.413426000  | 1.790559000  | 0.590500000  |
| 1 | 3.560421000  | 1.627094000  | -0.941187000 |
| 1 | 3.700930000  | -2.116576000 | -0.980808000 |
| 1 | 3.120857000  | -0.764180000 | -1.888827000 |
| 1 | 5.225640000  | -0.197812000 | -0.700652000 |
| 1 | 4.507320000  | -0.674216000 | 0.834162000  |
| 6 | -1.352650000 | -0.237923000 | 0.051791000  |
| 6 | -2.386771000 | -1.120872000 | 0.763450000  |
| 6 | -1.923666000 | 1.195864000  | -0.130902000 |
| 1 | -1.171424000 | -0.635327000 | -0.958138000 |

|   |              |              |              |
|---|--------------|--------------|--------------|
| 6 | -3.728346000 | -1.142987000 | 0.028147000  |
| 1 | -2.539380000 | -0.732761000 | 1.779263000  |
| 1 | -1.999949000 | -2.138962000 | 0.872619000  |
| 6 | -3.266000000 | 1.169503000  | -0.868545000 |
| 1 | -2.070678000 | 1.657392000  | 0.855083000  |
| 1 | -1.210818000 | 1.824390000  | -0.674261000 |
| 6 | -4.277630000 | 0.273792000  | -0.151285000 |
| 1 | -4.448616000 | -1.762855000 | 0.569914000  |
| 1 | -3.589880000 | -1.602016000 | -0.958709000 |
| 1 | -3.659017000 | 2.185913000  | -0.963932000 |
| 1 | -3.104117000 | 0.789517000  | -1.884466000 |
| 1 | -5.220576000 | 0.251270000  | -0.704753000 |
| 1 | -4.496656000 | 0.701058000  | 0.835437000  |

Sum of electronic and zero-point Energies= -  
495.544392

Sum of electronic and thermal Energies= -  
495.531172

Sum of electronic and thermal Enthalpies= -  
495.530228

Sum of electronic and thermal Free Energies= -  
495.585304

Lowest vibration frequency (/ cm<sup>-1</sup>): 17.07

## 13<sup>-</sup>

|   |              |              |              |
|---|--------------|--------------|--------------|
| 6 | 0.060033000  | 2.644263000  | -0.430923000 |
| 1 | 0.145707000  | 2.005470000  | -1.327668000 |
| 8 | 0.034253000  | 3.861920000  | -0.544041000 |
| 8 | -0.001198000 | 2.011791000  | 0.688622000  |
| 5 | -0.020785000 | 0.434007000  | 0.690296000  |
| 1 | -0.027859000 | 0.161848000  | 1.890252000  |
| 6 | -1.425868000 | -0.014107000 | -0.016590000 |
| 6 | -1.580888000 | -1.527599000 | -0.219453000 |
| 6 | -2.646481000 | 0.523532000  | 0.746527000  |
| 1 | -1.459611000 | 0.432950000  | -1.028116000 |
| 6 | -2.913805000 | -1.910329000 | -0.872492000 |
| 1 | -1.507030000 | -2.030043000 | 0.756795000  |
| 1 | -0.755766000 | -1.910467000 | -0.829153000 |
| 6 | -3.981554000 | 0.154670000  | 0.093098000  |

|   |              |              |              |
|---|--------------|--------------|--------------|
| 1 | -2.627932000 | 0.109263000  | 1.765013000  |
| 1 | -2.568921000 | 1.610748000  | 0.855154000  |
| 6 | -4.101878000 | -1.360368000 | -0.081844000 |
| 1 | -2.995339000 | -2.998203000 | -0.970786000 |
| 1 | -2.943026000 | -1.496485000 | -1.889029000 |
| 1 | -4.820901000 | 0.534796000  | 0.685337000  |
| 1 | -4.045954000 | 0.633461000  | -0.892795000 |
| 1 | -5.043927000 | -1.618567000 | -0.575651000 |
| 1 | -4.121705000 | -1.832891000 | 0.908995000  |
| 6 | 1.340055000  | -0.164699000 | -0.007477000 |
| 6 | 2.573192000  | 0.750491000  | 0.093429000  |
| 6 | 1.719036000  | -1.524333000 | 0.610284000  |
| 1 | 1.160224000  | -0.342044000 | -1.084439000 |
| 6 | 3.823808000  | 0.140265000  | -0.549816000 |

|   |             |              |              |
|---|-------------|--------------|--------------|
| 1 | 2.776495000 | 0.952401000  | 1.155630000  |
| 1 | 2.384073000 | 1.725229000  | -0.367087000 |
| 6 | 2.946769000 | -2.163577000 | -0.044076000 |
| 1 | 1.934138000 | -1.362760000 | 1.676047000  |
| 1 | 0.874045000 | -2.216796000 | 0.574847000  |
| 6 | 4.154750000 | -1.229903000 | 0.044394000  |
| 1 | 4.679078000 | 0.815891000  | -0.442053000 |
| 1 | 3.644781000 | 0.025134000  | -1.626903000 |
| 1 | 3.177311000 | -3.125359000 | 0.426583000  |
| 1 | 2.727141000 | -2.370144000 | -1.099691000 |
| 1 | 5.021927000 | -1.668092000 | -0.459575000 |

#### 14

|   |              |              |              |
|---|--------------|--------------|--------------|
| 5 | -0.062897000 | 0.533989000  | 0.144441000  |
| 8 | 0.033188000  | 1.968586000  | -0.650297000 |
| 6 | 0.450973000  | 3.004257000  | -0.130637000 |
| 1 | 0.529775000  | 3.919970000  | -0.713614000 |
| 8 | 0.819255000  | 3.109247000  | 1.103608000  |
| 1 | -0.053602000 | 0.828588000  | 1.345310000  |
| 1 | 0.659025000  | 2.236292000  | 1.536817000  |
| 6 | 1.256757000  | -0.316365000 | -0.260226000 |
| 6 | 2.501101000  | 0.520060000  | -0.606448000 |
| 6 | 1.627366000  | -1.291677000 | 0.873935000  |
| 1 | 1.023159000  | -0.922627000 | -1.151432000 |
| 6 | 3.707313000  | -0.352568000 | -0.966538000 |
| 1 | 2.768112000  | 1.149080000  | 0.256910000  |
| 1 | 2.289344000  | 1.198625000  | -1.438415000 |
| 6 | 2.817147000  | -2.185362000 | 0.515668000  |
| 1 | 1.885418000  | -0.700183000 | 1.763673000  |
| 1 | 0.766934000  | -1.905811000 | 1.154423000  |
| 6 | 4.039708000  | -1.340661000 | 0.152819000  |
| 1 | 4.576921000  | 0.272749000  | -1.191550000 |
| 1 | 3.473721000  | -0.913625000 | -1.880230000 |
| 1 | 3.054533000  | -2.856891000 | 1.346757000  |
| 1 | 2.547848000  | -2.817921000 | -0.339683000 |
| 1 | 4.877797000  | -1.980227000 | -0.139470000 |
| 1 | 4.360446000  | -0.780596000 | 1.040537000  |
| 6 | -1.501343000 | -0.027349000 | -0.309566000 |

#### TS<sub>3</sub>

|   |              |              |              |
|---|--------------|--------------|--------------|
| 6 | -0.789264000 | 2.930396000  | -0.619270000 |
| 1 | -1.029506000 | 3.562880000  | -1.474096000 |
| 8 | -0.943504000 | 3.345348000  | 0.543189000  |
| 8 | -0.343354000 | 1.764053000  | -0.878525000 |
| 5 | -0.009431000 | 0.806629000  | 0.269016000  |
| 1 | -0.127023000 | 1.488526000  | 1.446327000  |
| 1 | -0.500092000 | 2.313455000  | 1.165283000  |
| 6 | 1.558173000  | 0.465424000  | 0.250595000  |
| 6 | 1.923038000  | -0.608382000 | 1.286609000  |
| 6 | 2.091933000  | 0.063688000  | -1.137310000 |
| 1 | 2.101064000  | 1.383598000  | 0.528964000  |
| 6 | 3.427512000  | -0.887500000 | 1.321231000  |
| 1 | 1.396204000  | -1.539259000 | 1.036153000  |
| 1 | 1.570861000  | -0.310333000 | 2.280954000  |
| 6 | 3.598638000  | -0.209079000 | -1.102299000 |
| 1 | 1.579497000  | -0.840331000 | -1.486317000 |
| 1 | 1.869714000  | 0.850478000  | -1.864098000 |
| 6 | 3.942556000  | -1.280477000 | -0.065118000 |
| 1 | 3.652692000  | -1.674718000 | 2.047095000  |
| 1 | 3.952401000  | 0.016129000  | 1.655717000  |
| 1 | 3.953187000  | -0.512391000 | -2.092021000 |
| 1 | 4.123913000  | 0.719415000  | -0.844898000 |
| 1 | 5.022538000  | -1.451650000 | -0.036712000 |
| 1 | 3.476862000  | -2.228637000 | -0.363242000 |
| 6 | -1.157775000 | -0.302322000 | 0.422744000  |
| 6 | -2.556507000 | 0.321921000  | 0.571548000  |

|                                                         |             |              |             |
|---------------------------------------------------------|-------------|--------------|-------------|
| 1                                                       | 4.429521000 | -1.104905000 | 1.099799000 |
| Sum of electronic and zero-point Energies= -            |             |              |             |
| 684.855721                                              |             |              |             |
| Sum of electronic and thermal Energies= -               |             |              |             |
| 684.839664                                              |             |              |             |
| Sum of electronic and thermal Enthalpies= -             |             |              |             |
| 684.838720                                              |             |              |             |
| Sum of electronic and thermal Free Energies= -          |             |              |             |
| 684.899408                                              |             |              |             |
| Lowest vibration frequency (/ cm <sup>-1</sup> ): 36.44 |             |              |             |

|                                                         |              |              |              |
|---------------------------------------------------------|--------------|--------------|--------------|
| 6                                                       | -1.733645000 | -1.483681000 | 0.120041000  |
| 6                                                       | -2.664922000 | 0.845738000  | 0.185250000  |
| 1                                                       | -1.523347000 | -0.012954000 | -1.413082000 |
| 6                                                       | -3.099141000 | -2.014408000 | -0.327434000 |
| 1                                                       | -1.667475000 | -1.550592000 | 1.215918000  |
| 1                                                       | -0.942927000 | -2.126288000 | -0.280503000 |
| 6                                                       | -4.031819000 | 0.323834000  | -0.266407000 |
| 1                                                       | -2.640436000 | 0.869596000  | 1.283994000  |
| 1                                                       | -2.532274000 | 1.879442000  | -0.152818000 |
| 6                                                       | -4.236726000 | -1.125599000 | 0.177844000  |
| 1                                                       | -3.239748000 | -3.043157000 | 0.018838000  |
| 1                                                       | -3.127536000 | -2.039887000 | -1.424235000 |
| 1                                                       | -4.833247000 | 0.958330000  | 0.124989000  |
| 1                                                       | -4.091407000 | 0.374090000  | -1.361133000 |
| 1                                                       | -5.201522000 | -1.502218000 | -0.174959000 |
| 1                                                       | -4.261191000 | -1.163721000 | 1.274470000  |
| Sum of electronic and zero-point Energies= -            |              |              |              |
| 685.280570                                              |              |              |              |
| Sum of electronic and thermal Energies= -               |              |              |              |
| 685.264301                                              |              |              |              |
| Sum of electronic and thermal Enthalpies= -             |              |              |              |
| 685.263357                                              |              |              |              |
| Sum of electronic and thermal Free Energies= -          |              |              |              |
| 685.324953                                              |              |              |              |
| Lowest vibration frequency (/ cm <sup>-1</sup> ): 29.59 |              |              |              |

|                                                                     |              |              |              |
|---------------------------------------------------------------------|--------------|--------------|--------------|
| 6                                                                   | -1.162462000 | -1.324428000 | -0.729134000 |
| 1                                                                   | -0.950199000 | -0.858025000 | 1.350354000  |
| 6                                                                   | -3.653666000 | -0.731369000 | 0.739080000  |
| 1                                                                   | -2.785579000 | 0.919117000  | -0.322540000 |
| 1                                                                   | -2.572214000 | 1.010356000  | 1.424080000  |
| 6                                                                   | -2.269818000 | -2.371451000 | -0.574617000 |
| 1                                                                   | -1.298022000 | -0.792450000 | -1.680974000 |
| 1                                                                   | -0.194494000 | -1.829587000 | -0.787018000 |
| 6                                                                   | -3.644608000 | -1.718621000 | -0.428850000 |
| 1                                                                   | -4.632729000 | -0.250456000 | 0.824548000  |
| 1                                                                   | -3.483473000 | -1.279239000 | 1.674278000  |
| 1                                                                   | -2.262297000 | -3.055604000 | -1.428538000 |
| 1                                                                   | -2.063817000 | -2.974201000 | 0.318967000  |
| 1                                                                   | -4.416501000 | -2.481436000 | -0.291853000 |
| 1                                                                   | -3.887479000 | -1.180792000 | -1.354056000 |
| Sum of electronic and zero-point Energies= -                        |              |              |              |
| 685.274358                                                          |              |              |              |
| Sum of electronic and thermal Energies= -                           |              |              |              |
| 685.258504                                                          |              |              |              |
| Sum of electronic and thermal Enthalpies= -                         |              |              |              |
| 685.257560                                                          |              |              |              |
| Sum of electronic and thermal Free Energies= -                      |              |              |              |
| 685.318248                                                          |              |              |              |
| Lowest vibration frequencies (/ cm <sup>-1</sup> ): -1242.96, 36.06 |              |              |              |

### TS<sub>4</sub>

|   |              |              |              |   |                                                     |                |              |
|---|--------------|--------------|--------------|---|-----------------------------------------------------|----------------|--------------|
| 5 | -0.275915000 | 0.434302000  | -0.293857000 | 1 | 4.242921000                                         | -0.888443000   | -0.259522000 |
| 8 | -0.845879000 | 3.845056000  | -1.189427000 | 6 | -1.764556000                                        | -0.161493000   | -0.387442000 |
| 6 | -0.941289000 | 2.642010000  | -1.146133000 | 6 | -1.845371000                                        | -1.679172000   | -0.161298000 |
| 1 | -1.680133000 | 2.098543000  | -1.752755000 | 6 | -2.796093000                                        | 0.547623000    | 0.508344000  |
| 8 | -0.166603000 | 1.891680000  | -0.398972000 | 1 | -2.068049000                                        | 0.004531000    | -1.436666000 |
| 1 | -0.260977000 | 0.207832000  | 1.238863000  | 6 | -3.262464000                                        | -2.218593000   | -0.374923000 |
| 1 | 0.435287000  | 0.581359000  | 1.365068000  | 1 | -1.530244000                                        | -1.906452000   | 0.866803000  |
| 8 | 1.829604000  | 1.381854000  | 1.967370000  | 1 | -1.149373000                                        | -2.198721000   | -0.826169000 |
| 6 | 2.341199000  | 0.790384000  | 2.954225000  | 6 | -4.215197000                                        | 0.014204000    | 0.292981000  |
| 1 | 3.298017000  | 1.223119000  | 3.325540000  | 1 | -2.516471000                                        | 0.388570000    | 1.559096000  |
| 8 | 1.904907000  | -0.210307000 | 3.549546000  | 1 | -2.783699000                                        | 1.630626000    | 0.350593000  |
| 6 | 0.966735000  | -0.375082000 | -0.902283000 | 6 | -4.273229000                                        | -1.497268000   | 0.517145000  |
| 6 | 2.111740000  | 0.531185000  | -1.384749000 | 1 | -3.288159000                                        | -3.295510000   | -0.184548000 |
| 6 | 1.536972000  | -1.462785000 | 0.027875000  | 1 | -3.543084000                                        | -2.072731000   | -1.425660000 |
| 1 | 0.567373000  | -0.893822000 | -1.791884000 | 1 | -4.915579000                                        | 0.525056000    | 0.960167000  |
| 6 | 3.230942000  | -0.268643000 | -2.056912000 | 1 | -4.529297000                                        | 0.239072000    | -0.734052000 |
| 1 | 2.510889000  | 1.071672000  | -0.518248000 | 1 | -5.283494000                                        | -1.872559000   | 0.330807000  |
| 1 | 1.729965000  | 1.286582000  | -2.078587000 | 1 | -4.041303000                                        | -1.711864000   | 1.567913000  |
| 6 | 2.643637000  | -2.273913000 | -0.650180000 |   | Sum of electronic and zero-point Energies=          | -              |              |
| 1 | 1.949545000  | -0.974339000 | 0.918671000  |   | 874.563638                                          |                |              |
| 1 | 0.746579000  | -2.131570000 | 0.379109000  |   | Sum of electronic and thermal Energies=             | -              |              |
| 6 | 3.771500000  | -1.359749000 | -1.131355000 |   | 874.543032                                          |                |              |
| 1 | 4.040732000  | 0.398613000  | -2.368278000 |   | Sum of electronic and thermal Enthalpies=           | -              |              |
| 1 | 2.837635000  | -0.737659000 | -2.968355000 |   | 874.542088                                          |                |              |
| 1 | 3.035366000  | -3.028287000 | 0.039237000  |   | Sum of electronic and thermal Free Energies=        | -              |              |
| 1 | 2.223942000  | -2.812807000 | -1.509545000 |   | 874.614597                                          |                |              |
| 1 | 4.547795000  | -1.940836000 | -1.638210000 |   | Lowest vibration frequencies (/ cm <sup>-1</sup> ): | -231.08, 27.89 |              |

### 3.1. CatB derivatives

#### 15<sup>-</sup>

|   |              |              |              |   |                                                   |              |              |
|---|--------------|--------------|--------------|---|---------------------------------------------------|--------------|--------------|
| 6 | 1.004715000  | -0.474494000 | -0.542965000 | 1 | -2.076927000                                      | 3.079078000  | -0.555189000 |
| 6 | 2.055422000  | -0.846515000 | -1.355496000 | 8 | -0.154162000                                      | 2.470706000  | -0.690782000 |
| 6 | 3.355383000  | -0.738333000 | -0.832095000 | 8 | -1.928175000                                      | -0.985375000 | 0.971796000  |
| 6 | 3.570377000  | -0.270916000 | 0.457967000  | 6 | -2.925985000                                      | -1.512940000 | 0.305046000  |
| 6 | 2.494849000  | 0.108704000  | 1.279462000  | 1 | -3.486961000                                      | -2.224498000 | 0.927407000  |
| 6 | 1.221868000  | -0.000916000 | 0.759741000  | 8 | -3.229097000                                      | -1.284852000 | -0.842498000 |
| 1 | 1.877782000  | -1.210196000 | -2.360530000 |   | Sum of electronic and zero-point Energies=        | -            |              |
| 1 | 4.199888000  | -1.025407000 | -1.447452000 |   | 784.802517                                        |              |              |
| 1 | 4.581054000  | -0.196052000 | 0.841394000  |   | Sum of electronic and thermal Energies=           | -            |              |
| 1 | 2.652862000  | 0.476386000  | 2.286321000  |   | 784.790175                                        |              |              |
| 8 | -0.318166000 | -0.497399000 | -0.822604000 |   | Sum of electronic and thermal Enthalpies=         | -            |              |
| 5 | -1.010908000 | 0.013125000  | 0.369719000  |   | 784.789231                                        |              |              |
| 8 | 0.045130000  | 0.296056000  | 1.354411000  |   | Sum of electronic and thermal Free Energies=      | -            |              |
| 8 | -1.846719000 | 1.208105000  | 0.091031000  |   | 784.842332                                        |              |              |
| 6 | -1.317236000 | 2.298265000  | -0.410223000 |   | Lowest vibration frequency (/ cm <sup>-1</sup> ): | 35.33        |              |

#### 16

|   |              |              |              |   |                                            |              |              |
|---|--------------|--------------|--------------|---|--------------------------------------------|--------------|--------------|
| 6 | -1.009543000 | -0.778139000 | 0.014765000  | 5 | 1.155335000                                | -0.499611000 | -0.040195000 |
| 6 | -2.296906000 | -1.266953000 | 0.058578000  | 8 | 0.628982000                                | 0.771297000  | -0.071658000 |
| 6 | -3.321709000 | -0.315060000 | 0.046350000  | 8 | 2.477561000                                | -0.861821000 | -0.082472000 |
| 6 | -3.048307000 | 1.051390000  | -0.006961000 | 6 | 3.522559000                                | -0.002458000 | -0.020954000 |
| 6 | -1.735857000 | 1.533273000  | -0.050346000 | 1 | 4.458319000                                | -0.549128000 | -0.169308000 |
| 6 | -0.737887000 | 0.584306000  | -0.038027000 | 8 | 3.433668000                                | 1.168720000  | 0.174861000  |
| 1 | -2.497493000 | -2.329519000 | 0.100078000  |   | Sum of electronic and zero-point Energies= | -            |              |
| 1 | -4.350824000 | -0.650403000 | 0.079198000  |   | 595.476471                                 |              |              |
| 1 | -3.869030000 | 1.757562000  | -0.015062000 |   | Sum of electronic and thermal Energies=    | -            |              |
| 1 | -1.510803000 | 2.590960000  | -0.091661000 |   | 595.467291                                 |              |              |
| 8 | 0.179672000  | -1.473142000 | 0.013932000  |   |                                            |              |              |

Sum of electronic and thermal Enthalpies= -  
595.466347

Sum of electronic and thermal Free Energies= -  
595.512336  
Lowest vibration frequency (/ cm<sup>-1</sup>): 29.73

### TS<sub>1</sub>

|   |              |              |              |
|---|--------------|--------------|--------------|
| 6 | -1.296698000 | -0.110666000 | 0.616292000  |
| 6 | -2.310678000 | 0.100515000  | 1.525783000  |
| 6 | -3.626289000 | 0.078447000  | 1.038012000  |
| 6 | -3.890627000 | -0.148542000 | -0.307932000 |
| 6 | -2.851513000 | -0.363710000 | -1.226183000 |
| 6 | -1.562150000 | -0.340892000 | -0.738263000 |
| 1 | -2.093468000 | 0.276234000  | 2.572102000  |
| 1 | -4.446792000 | 0.243618000  | 1.725623000  |
| 1 | -4.915480000 | -0.158091000 | -0.658677000 |
| 1 | -3.047046000 | -0.543031000 | -2.276156000 |
| 8 | 0.046696000  | -0.146237000 | 0.842290000  |
| 5 | 0.654098000  | -0.290895000 | -0.464917000 |
| 8 | -0.398518000 | -0.531736000 | -1.419836000 |
| 6 | 1.941366000  | 1.922395000  | -0.171213000 |
| 8 | 1.349186000  | 2.934388000  | -0.397859000 |

|                                                                    |             |              |              |
|--------------------------------------------------------------------|-------------|--------------|--------------|
| 8                                                                  | 1.768609000 | -1.192881000 | -0.573805000 |
| 6                                                                  | 2.578741000 | -1.404778000 | 0.453053000  |
| 1                                                                  | 2.250658000 | -0.951375000 | 1.395837000  |
| 8                                                                  | 3.580431000 | -2.065605000 | 0.355721000  |
| 1                                                                  | 1.194146000 | 0.903823000  | -0.804388000 |
| 8                                                                  | 2.890418000 | 1.412905000  | 0.347607000  |
| Sum of electronic and zero-point Energies= -                       |             |              |              |
| 784.738912                                                         |             |              |              |
| Sum of electronic and thermal Energies= -                          |             |              |              |
| 784.726178                                                         |             |              |              |
| Sum of electronic and thermal Enthalpies= -                        |             |              |              |
| 784.725234                                                         |             |              |              |
| Sum of electronic and thermal Free Energies= -                     |             |              |              |
| 784.780520                                                         |             |              |              |
| Lowest vibration frequencies (/ cm <sup>-1</sup> ): -578.88, 27.21 |             |              |              |

### TS<sub>2</sub>

|   |              |              |              |
|---|--------------|--------------|--------------|
| 6 | -0.878395000 | 0.697112000  | -0.074766000 |
| 6 | -2.046171000 | 1.424535000  | -0.018088000 |
| 6 | -3.242220000 | 0.695820000  | 0.039682000  |
| 6 | -3.242282000 | -0.695627000 | 0.039636000  |
| 6 | -2.046301000 | -1.424452000 | -0.018196000 |
| 6 | -0.878454000 | -0.697139000 | -0.074835000 |
| 1 | -2.033710000 | 2.506842000  | -0.017922000 |
| 1 | -4.182898000 | 1.230459000  | 0.085438000  |
| 1 | -4.183008000 | -1.230184000 | 0.085375000  |
| 1 | -2.033945000 | -2.506761000 | -0.018092000 |
| 8 | 0.412657000  | 1.162351000  | -0.139593000 |
| 5 | 1.211493000  | -0.000124000 | -0.171707000 |
| 8 | 0.412559000  | -1.162484000 | -0.139693000 |

|                                                                    |             |              |              |
|--------------------------------------------------------------------|-------------|--------------|--------------|
| 8                                                                  | 2.350209000 | -0.000301000 | 0.959503000  |
| 6                                                                  | 3.165755000 | 0.000001000  | 0.035048000  |
| 1                                                                  | 2.115994000 | -0.000043000 | -1.115543000 |
| 8                                                                  | 4.233140000 | 0.000284000  | -0.396667000 |
| Sum of electronic and zero-point Energies= -                       |             |              |              |
| 595.390423                                                         |             |              |              |
| Sum of electronic and thermal Energies= -                          |             |              |              |
| 595.381691                                                         |             |              |              |
| Sum of electronic and thermal Enthalpies= -                        |             |              |              |
| 595.380747                                                         |             |              |              |
| Sum of electronic and thermal Free Energies= -                     |             |              |              |
| 595.425125                                                         |             |              |              |
| Lowest vibration frequencies (/ cm <sup>-1</sup> ): -656.46, 68.64 |             |              |              |

### 17

|   |              |              |              |
|---|--------------|--------------|--------------|
| 6 | 0.270077000  | 0.694644000  | -0.000007000 |
| 6 | -0.897543000 | 1.428468000  | 0.000002000  |
| 6 | -2.089122000 | 0.697746000  | 0.000013000  |
| 6 | -2.089131000 | -0.697737000 | 0.000013000  |
| 6 | -0.897560000 | -1.428457000 | 0.000000000  |
| 6 | 0.270072000  | -0.694644000 | -0.000010000 |
| 1 | -0.884769000 | 2.510512000  | -0.000005000 |
| 1 | -3.032659000 | 1.228990000  | 0.000018000  |
| 1 | -3.032679000 | -1.228962000 | 0.000019000  |
| 1 | -0.884776000 | -2.510503000 | -0.000006000 |
| 8 | 1.571721000  | 1.139550000  | -0.000042000 |
| 5 | 2.351843000  | 0.000000000  | 0.000081000  |

|                                                          |             |              |              |
|----------------------------------------------------------|-------------|--------------|--------------|
| 8                                                        | 1.571692000 | -1.139573000 | -0.000038000 |
| 1                                                        | 3.527600000 | 0.000012000  | 0.000142000  |
| Sum of electronic and zero-point Energies= -             |             |              |              |
| 406.884377                                               |             |              |              |
| Sum of electronic and thermal Energies= -                |             |              |              |
| 406.878396                                               |             |              |              |
| Sum of electronic and thermal Enthalpies= -              |             |              |              |
| 406.877452                                               |             |              |              |
| Sum of electronic and thermal Free Energies= -           |             |              |              |
| 406.914560                                               |             |              |              |
| Lowest vibration frequency (/ cm <sup>-1</sup> ): 221.67 |             |              |              |

### 18<sup>-</sup>

|   |              |              |              |
|---|--------------|--------------|--------------|
| 6 | -0.959178000 | -0.776723000 | -0.196601000 |
| 6 | -2.203129000 | -1.246747000 | 0.175800000  |
| 6 | -3.211699000 | -0.303398000 | 0.439009000  |
| 6 | -2.962463000 | 1.058069000  | 0.326711000  |
| 6 | -1.694173000 | 1.531910000  | -0.051667000 |
| 6 | -0.706246000 | 0.602006000  | -0.309224000 |
| 1 | -2.389472000 | -2.311029000 | 0.259384000  |
| 1 | -4.195736000 | -0.647905000 | 0.734306000  |
| 1 | -3.753633000 | 1.769258000  | 0.533266000  |
| 1 | -1.491575000 | 2.592601000  | -0.142683000 |
| 8 | 0.142029000  | -1.487441000 | -0.515698000 |
| 5 | 1.251078000  | -0.505711000 | -0.670841000 |
| 8 | 0.566399000  | 0.820559000  | -0.700166000 |
| 8 | 2.060053000  | -0.613430000 | 0.610944000  |

|                                                         |             |              |              |
|---------------------------------------------------------|-------------|--------------|--------------|
| 6                                                       | 3.166578000 | 0.055136000  | 0.763265000  |
| 1                                                       | 3.649700000 | -0.169553000 | 1.726666000  |
| 8                                                       | 3.656309000 | 0.841311000  | -0.021485000 |
| 1                                                       | 1.948865000 | -0.714321000 | -1.629248000 |
| Sum of electronic and zero-point Energies= -            |             |              |              |
| 596.194457                                              |             |              |              |
| Sum of electronic and thermal Energies= -               |             |              |              |
| 596.185031                                              |             |              |              |
| Sum of electronic and thermal Enthalpies= -             |             |              |              |
| 596.184087                                              |             |              |              |
| Sum of electronic and thermal Free Energies= -          |             |              |              |
| 596.230420                                              |             |              |              |
| Lowest vibration frequency (/ cm <sup>-1</sup> ): 37.43 |             |              |              |

**19** (H-bond found between proton of FA and one O from catechol backbone)

|   |              |              |              |                                                         |              |              |              |   |
|---|--------------|--------------|--------------|---------------------------------------------------------|--------------|--------------|--------------|---|
| 6 | 0.895877000  | -0.874406000 | 0.093466000  | 6                                                       | -2.762406000 | 0.279193000  | -0.887394000 |   |
| 6 | 2.119443000  | -1.140482000 | -0.485952000 | 1                                                       | -3.456672000 | 0.267858000  | -1.726214000 |   |
| 6 | 3.008686000  | -0.066665000 | -0.631004000 | 8                                                       | -2.617200000 | 1.428016000  | -0.321260000 |   |
| 6 | 2.670996000  | 1.214461000  | -0.207102000 | 1                                                       | -1.979584000 | -1.400491000 | 1.604928000  |   |
| 6 | 1.426371000  | 1.476740000  | 0.383431000  | 1                                                       | -1.913973000 | 1.357018000  | 0.377996000  |   |
| 6 | 0.563160000  | 0.412233000  | 0.519732000  | Sum of electronic and zero-point Energies=              |              |              |              | - |
| 1 | 2.375238000  | -2.140703000 | -0.812448000 | 596.610833                                              |              |              |              |   |
| 1 | 3.977262000  | -0.241178000 | -1.083811000 | Sum of electronic and thermal Energies=                 |              |              |              | - |
| 1 | 3.378471000  | 2.024616000  | -0.333152000 | 596.601282                                              |              |              |              |   |
| 1 | 1.151437000  | 2.468154000  | 0.721284000  | Sum of electronic and thermal Enthalpies=               |              |              |              | - |
| 8 | -0.118992000 | -1.743395000 | 0.358694000  | 596.600337                                              |              |              |              |   |
| 5 | -1.223750000 | -0.945519000 | 0.808441000  | Sum of electronic and thermal Free Energies=            |              |              |              | - |
| 8 | -0.694595000 | 0.400461000  | 1.076501000  | 596.646371                                              |              |              |              |   |
| 8 | -2.187487000 | -0.761847000 | -0.551666000 | Lowest vibration frequency (/ cm <sup>-1</sup> ): 52.70 |              |              |              |   |

**TS<sub>3</sub>**

|   |              |              |              |                                                                     |             |              |              |   |
|---|--------------|--------------|--------------|---------------------------------------------------------------------|-------------|--------------|--------------|---|
| 6 | -0.948540000 | 0.698396000  | 0.004903000  | 6                                                                   | 3.517347000 | -0.000010000 | -0.379061000 |   |
| 6 | -2.120141000 | 1.422916000  | 0.018653000  | 1                                                                   | 4.308933000 | -0.000035000 | -1.128520000 |   |
| 6 | -3.319184000 | 0.695361000  | 0.034063000  | 8                                                                   | 3.767106000 | 0.000028000  | 0.828906000  |   |
| 6 | -3.319183000 | -0.695360000 | 0.034085000  | 1                                                                   | 1.618997000 | -0.000017000 | 1.379154000  |   |
| 6 | -2.120139000 | -1.422914000 | 0.018694000  | 1                                                                   | 2.548449000 | 0.000025000  | 1.270380000  |   |
| 6 | -0.948539000 | -0.698392000 | 0.004906000  | Sum of electronic and zero-point Energies=                          |             |              |              | - |
| 1 | -2.108392000 | 2.505449000  | 0.016912000  | 596.584071                                                          |             |              |              |   |
| 1 | -4.260465000 | 1.230882000  | 0.047711000  | Sum of electronic and thermal Energies=                             |             |              |              | - |
| 1 | -4.260463000 | -1.230883000 | 0.047764000  | 596.574967                                                          |             |              |              |   |
| 1 | -2.108387000 | -2.505447000 | 0.016984000  | Sum of electronic and thermal Enthalpies=                           |             |              |              | - |
| 8 | 0.337559000  | 1.164784000  | -0.021619000 | 596.574023                                                          |             |              |              |   |
| 5 | 1.157779000  | 0.000005000  | 0.073914000  | Sum of electronic and thermal Free Energies=                        |             |              |              | - |
| 8 | 0.337554000  | -1.164781000 | -0.021646000 | 596.619671                                                          |             |              |              |   |
| 8 | 2.310619000  | -0.000029000 | -0.840317000 | Lowest vibration frequencies (/ cm <sup>-1</sup> ): -1374.46, 38.68 |             |              |              |   |

**TS<sub>4</sub>**

|   |              |              |              |                                                                    |              |              |              |   |
|---|--------------|--------------|--------------|--------------------------------------------------------------------|--------------|--------------|--------------|---|
| 6 | 1.531546000  | 0.488744000  | 0.502015000  | 8                                                                  | -2.257804000 | -2.403957000 | -0.609761000 |   |
| 6 | 2.534017000  | 1.416598000  | 0.686759000  | 1                                                                  | -0.958876000 | 0.016473000  | -0.956001000 |   |
| 6 | 3.773805000  | 1.136585000  | 0.096971000  | 1                                                                  | -1.723511000 | 0.284760000  | -0.753037000 |   |
| 6 | 3.978371000  | -0.027434000 | -0.638348000 | 6                                                                  | -3.307734000 | 1.947410000  | -0.403367000 |   |
| 6 | 2.951971000  | -0.964722000 | -0.819414000 | 1                                                                  | -4.352376000 | 2.282855000  | -0.230816000 |   |
| 6 | 1.736136000  | -0.678459000 | -0.236554000 | 8                                                                  | -2.425764000 | 2.809826000  | -0.482333000 |   |
| 1 | 2.363172000  | 2.318517000  | 1.260740000  | 8                                                                  | -3.164700000 | 0.691075000  | -0.498986000 |   |
| 1 | 4.585741000  | 1.843354000  | 0.216444000  | Sum of electronic and zero-point Energies=                         |              |              |              | - |
| 1 | 4.948121000  | -0.214112000 | -1.083354000 | 785.889702                                                         |              |              |              |   |
| 1 | 3.101081000  | -1.873819000 | -1.388126000 | Sum of electronic and thermal Energies=                            |              |              |              | - |
| 8 | 0.249610000  | 0.514479000  | 0.977070000  | 785.875898                                                         |              |              |              |   |
| 5 | -0.381421000 | -0.601164000 | 0.380461000  | Sum of electronic and thermal Enthalpies=                          |              |              |              | - |
| 8 | 0.587040000  | -1.422512000 | -0.250530000 | 785.874954                                                         |              |              |              |   |
| 8 | -1.480858000 | -1.138174000 | 1.078430000  | Sum of electronic and thermal Free Energies=                       |              |              |              | - |
| 6 | -2.354398000 | -1.962881000 | 0.501358000  | 785.932827                                                         |              |              |              |   |
| 1 | -3.178729000 | -2.193142000 | 1.184209000  | Lowest vibration frequencies (/ cm <sup>-1</sup> ): -597.86, 21.39 |              |              |              |   |

## 7. References

- [1] R. W. W. Hooft, *COLLECT*, Nonius BV, Delft, The Netherlands, **1998**.
- [2] Z. Otwinowski, W. Minor, *Methods Enzymol.* **1997**, *276*, 307–326.
- [3] G. M. Sheldrick, *Acta Crystallogr., Sect. A* **2008**, *64*, 112–122.
- [4] G. M. Sheldrick, SHELXT, University of Göttingen, Germany, **2014**.
- [5] L. J. Farrugia, *J. Appl. Crystallogr.* **1997**, *30*, 565.
- [6] A. Abiko, *Org. Synth.* **2002**, *79*, 103.
- [7] a) R. G. Parr, W. Yang, *Density-Functional Theory of Atoms and Molecules*; Oxford University Press: Oxford, U.K. **1989**; b) Gaussian 09, Revision B.01, M. J. Frisch, G. W. Trucks, H. B. Schlegel, G. E. Scuseria, M. A. Robb, J. R. Cheeseman, G. Scalmani, V. Barone, B. Mennucci, G. A. Petersson, H. Nakatsuji, M. Caricato, X. Li, H. P. Hratchian, A. F. Izmaylov, J. Bloino, G. Zheng, J. L. Sonnenberg, M. Hada, M. Ehara, K. Toyota, R. Fukuda, J. Hasegawa, M. Ishida, T. Nakajima, Y. Honda, O. Kitao, H. Nakai, T. Vreven, J. A. Montgomery, Jr., J. E. Peralta, F. Ogliaro, M. Bearpark, J. J. Heyd, E. Brothers, K. N. Kudin, V. N. Staroverov, T. Keith, R. Kobayashi, J. Normand, K. Raghavachari, A. Rendell, J. C. Burant, S. S. Iyengar, J. Tomasi, M. Cossi, N. Rega, J. M. Millam, M. Klene, J. E. Knox, J. B. Cross, V. Bakken, C. Adamo, J. Jaramillo, R. Gomperts, R. E. Stratmann, O. Yazyev, A. J. Austin, R. Cammi, C. Pomelli, J. W. Ochterski, R. L. Martin, K. Morokuma, V. G. Zakrzewski, G. A. Voth, P. Salvador, J. J. Dannenberg, S. Dapprich, A. D. Daniels, O. Farkas, J. B. Foresman, J. V. Ortiz, J. Cioslowski, and D. J. Fox, Gaussian, Inc., Wallingford CT, 2010; c) R. Krishnan, J. S. Binkley, R. Seeger, J. A. Pople, *J. Chem. Phys.* **1980**, *72*, 650–654; d) T. Clark, J. Chandrasekhar, G. W. Spitznagel, P. v. R. Schleyer, *J. Comput. Chem.* **1983**, *4*, 294–301; e) Y. Zhao, D. G. Truhlar *Theor. Chem. Acc.* **1981**, *55*, 117–129; f) S. Miertus, E. Scrocco, J. Tomasi, *Chem. Phys.* **1981**, *55*, 117–129; g) G. Scalmani, M. J. Frisch, B. Mennucci, J. Tomasi, R. Cammi, V. Barone, *J. Chem. Phys.* **2006**, *124*, 094107.
